27 **Abstract**

28 The hippocampal place cells encode spatial representation but it remains unclear how they store  
29 concurrent positive or negative experiences. Here, we report on place field reconfiguration in  
30 response to an innately aversive odor trimethylthiazoline (TMT). The advantage of TMT is the  
31 absence of learning curve required for associative fear conditioning. Our study investigated if  
32 CA1 place cells, recorded from behaving rats, remap randomly or if their reconfiguration  
33 depends on the location of the aversive stimulus perception. Exposure to TMT increased the  
34 amplitude of hippocampal beta oscillations in two arms of a maze (TMT arms). We found that  
35 a population of place cells with fields located outside the TMT arms increased their activity  
36 (extra-field spiking) in the TMT arms during the aversive episodes. These cells exhibited  
37 significant shift of the center of mass towards the TMT arms in the subsequent post-TMT  
38 recording. The induction of extra-field plasticity was mediated by the basolateral amygdala  
39 complex (BLA). Photostimulation of the BLA triggered aversive behavior, synchronized  
40 response of hippocampal local field oscillations, augmented theta rhythm amplitude and  
41 increased the spiking of place cells for the first 100ms after the light delivery. This occurred  
42 only for the extra-field- but not for intra-field spikes. Optogenetic BLA-triggered an increase  
43 in extra-field spiking activity correlated to the degree of place field plasticity in the post-ChR2  
44 recording session. Our findings demonstrate that the increased extra-field activity during  
45 aversive episodes mediates the degree of subsequent field plasticity.

46

47

48

49

50

51 **Introduction**

52 Hippocampus temporally encodes representations of spatial context-dependent experiences  
53 (Knierim, 2003) and these memory traces are functionally strengthened in the cortical areas for  
54 long-term recollection (Nadel and Moscovitch, 1997; Kitamura et al., 2009; Tayler et al., 2013;  
55 Denny et al., 2014). Current theories propose that memory of spatial location is encoded by  
56 hippocampal place cells (O'Keefe and Nadel, 1978), but there is scarce information how these  
57 neurons encode non-spatial information such as aversive episodes. We know that aversion  
58 evokes place field remapping (Moita et al., 2004; Kim et al., 2015) where a subset of neurons  
59 in hippocampal area CA1 change their preferred firing locations in response to predator odor  
60 (Wang et al., 2012). However, it is still unclear which neurons remap to encode fearful  
61 experience and which neurons preserve their spatial fields. Here, we examined the principles  
62 governing aversion-induced place field remapping. We tested the hypothesis that the place cells  
63 remapping depends on the spatial location of the aversive stimulus perception. The evaluation  
64 of change of place field center of mass ( $\Delta$ COM) is the most sensitive indicator of experience-  
65 dependent place field place field reconfiguration (Mehta et al., 1997; Knierim, 2002; Lee et al.,  
66 2004; Lee et al., 2006). We evaluated here the aversion-induced long-term shift of the  $\Delta$ COM  
67 for all place fields. Beta frequency band (15-30Hz) has been reported as a reliable indicator for  
68 the detection of aversive olfactory signals by the limbic circuitry (Igarashi et al., 2014). We  
69 analyzed the amplitude of hippocampal beta frequency to determine which section of the maze  
70 was the main location of the aversion odor perception (Trimethylthiazoline - TMT).

71 The amygdala supports aversive associative memories and relates adaptive behavior to the  
72 emotional valence of sensory stimuli (Phelps and LeDoux, 2005; Sadrian and Wilson, 2015).  
73 Amygdalar signaling of aversion controls the stability of hippocampal place cells and lesioning  
74 of the amygdala prevents the effect of fearful experience on the place fields remapping (Kim  
75 et al., 2015). Inactivation of amygdala blocks tone-induced fear conditioning that triggers place

76 field remapping (Donzis et al., 2013), while amygdalar activation reduces the field stability of  
77 hippocampal place cells (Kim et al., 2012). Aversion-induced activation of the pyramidal  
78 neurons in amygdala mediates the formation of spatial context-dependent place aversion and  
79 in parallel with new hippocampal engrams (Ramirez et al., 2013; Ryan et al., 2015). However,  
80 there have been no direct tests of how new hippocampal ensembles are formed. To understand  
81 the mechanism of aversion-induced population response from hippocampal spatial  
82 representation we optogenetically activated pyramidal neurons from basolateral complex of  
83 amygdala (BLA). We photostimulated BLA to determine if the patterns of ensembles  
84 reconfiguration after aversion-induced place field remapping are replicated after optogenetic  
85 BLA activation. We investigated if the degree of place field plasticity differs when the spatial  
86 optogenetic stimulation was applied to the main place field compared to optogenetic  
87 stimulation of the extra-field activity. Extra-field spikes, previously considered to be noise, are  
88 now proposed to play an essential role in information processing, learning and memory  
89 formation (Johnson and Redish, 2007; Johnson et al., 2009; Epsztein et al., 2011; Ferguson et  
90 al., 2011; Wu et al., 2017). Here, we explored if intra- or extra-field spikes mediate experience-  
91 dependent encoding of aversive episodes.

92

93

94

95

96

97

98

99

100



## 101 **Materials and Methods**

### 102 *Ethics Statement*

103 We conducted our experiments in accordance with directive 2010/63/EU of the European  
104 Parliament and of the council of 22 September 2010 on the protection of animals used for  
105 scientific purposes and the S.I. No. 543 of 2012, and followed Bioresources Ethics Committee  
106 (individual authorization number AE19136/I037; Procedure Numbers 230113-1001, 230113-  
107 1002, 230113-1003, 230113-1004 and 230113-1005) and international guidelines of good  
108 practice (project authorization number: AE19136/P003).

### 109 *Animals*

110 Male, 3-6 months old, Lister-Hooded rats were individually housed for at least 7 days before  
111 all experiments, under a 12-h light–dark cycle, provided with water *ad libitum*. Prior the  
112 experiments restricted feeding diet kept the rats on 80% of their expected weight when fed *ad*  
113 *libitum*. Experiments were performed during the light phase.

### 114 *Surgical implantation of recording electrodes and recording techniques*

115 Eight tetrodes and optic fiber were implanted in hippocampal CA1 area: -3.8 AP, 2.3 ML and  
116 1.8 mm dorsoventral to dura. The optic fiber and tetrodes were implanted unilaterally in BLA:  
117 2.4 AP, 4.9 ML, and 7.0 mm dorsoventral to dura. After a minimum 1 week recovery, subjects  
118 were connected, via a 32-channel headstage (Axona Ltd.) to a recording system, which allowed  
119 simultaneous animal position tracking. Signals were amplified (10000- to 30000-fold) and  
120 band-pass filtered between 380 Hz and 6 kHz for single-unit detection. To maximize cell  
121 separation, only waveforms of sufficient amplitude (at least three times the noise threshold)  
122 were recorded. Candidate waveforms were discriminated off-line using graphical software  
123 (Tint, Axona Ltd.), which allows waveform separation based on multiple features including  
124 spike amplitude, spike duration, maximum and minimum spike voltage, and the time of  
125 occurrence of maximum and minimum spike voltages. Autocorrelation histograms were

126 calculated for each unit, and the unit was removed from further analysis if the histogram  
127 presented spiking within the first 1 ms (refractory period), inconsistent with good unit isolation.  
128 Only stable recordings across consecutive days were further analyzed. The stability of the  
129 signal was evaluated by the cross-correlation of spike amplitudes and similarity comparison of  
130 the spike clusters between the sessions and cluster distributions. The single unit signals from  
131 the last recording session and the probe were compared for waveform similarity, cluster  
132 location, size, and boundaries. Peak and trough amplitudes of the averaged spike waveforms  
133 were compared using Pearson's  $r$ . Values for  $r \geq 0.8$  indicated that the same populations of  
134 cells were recorded throughout the last recording session and the probe.

### 135 ***Hippocampal unit identification and spatial firing analysis***

136 Single hippocampal pyramidal cells and interneurons were identified using spike shape and  
137 firing frequency characteristics (Ranck, 1973; Wilson and McNaughton, 1993). Firing rate  
138 maps allow for visual inspection of neurons preferred areas of firing (i.e. place fields). They  
139 were constructed by normalizing the number of spikes which occurred in specific pixelated  
140 coordinates by the total trial time the animal spent in that pixel. This produced maps depicting  
141 the place fields of each cell. Maps were quantified in Hz (smoothed maps). We defined place  
142 field size as the region of the arena in which the firing rate of the place cell was greater than  
143 20% of the maximum firing frequency (Brun et al., 2002). Appearance of sharp waves and  
144 ripples during immobility, triggers the spiking of multiple place cells (Wu et al., 2017). To  
145 avoid spikes reactivation during sharp wave ripple we excluded spikes from epochs with  
146 running speeds below 5 cm/s (Alme et al., 2014; Grosmark and Buzsaki, 2016). The place field  
147 analysis included only epochs during which the animal's velocity was at least 5 cm/s.

### 148 ***Extra-field spiking***

149 Place fields were defined as areas of 9 contiguous pixels ( $2.5 \text{ cm}^2 / \text{pixel}$ ) with average activity  
150  $>20\%$  of the field maximum rate. Extra-field spiking was defined as spikes occurring outside

151 of the identified place field areas (Huxter et al., 2003; Johnson and Redish, 2007). The extra-  
152 field spiking thus included secondary place fields with sizes smaller than 9 contiguous pixels  
153 or with averaged firing rate smaller than 20% of the maximum firing rate (Brun et al., 2002;  
154 Huxter et al., 2003; Johnson and Redish, 2007).

#### 155 *Measurement of local field activity.*

156 The local field potential (LFP) was sampled at 250 Hz and stored for further off-line analysis.  
157 LFP signal frequency analysis was carried out using MATLAB's Signal Processing Toolbox  
158 (MATLAB, Natick, MA) where the power was calculated using the Short-Time Fourier  
159 Transform of the signal (Hanning window of 2s, with overlap of 1s) and interpolated into color-  
160 coded power spectrograms. Information was displayed as the magnitude of the time-dependent  
161 Fourier Transform versus time in a color gradient graph with the maximum corresponding to 0  
162 dB.

#### 163 *Phase-locking value*

164 To evaluate the effect of optogenetic BLA stimulation we compared the hippocampal local  
165 field oscillations of a single electrode between multiple trials (Mamad et al., 2015). Phase-  
166 locking statistics measures the significance of the phase covariance between separate signals  
167 and allows direct quantification of frequency-specific synchronization (i.e., transient phase-  
168 locking) between local field potentials (Lachaux et al., 1999). The phase-locking value is the  
169 amplitude of the first circular moment of the measured phase difference between two phases  
170 (Lachaux et al., 1999; Canolty et al., 2010). The phase-locking value ranges between 0 and 1;  
171 0 signifying purely random rise and fall whereas a value of 1 signifies that one signal perfectly  
172 follows the other. To distinguish between noise-related fluctuations of the phase-locking values  
173 we compared the observed data with shuffled data (Mamad et al., 2015).

#### 174 *Experimental design*

175 The animals were trained to navigate between the northwest and southeast corners of  
176 rectangular-shaped linear track, where two pellets were continuously positioned. The animals  
177 were allowed to freely navigate in both clockwise and counter-clockwise directions of this  
178 rectangular-shaped linear track (10cm width, 85cm length of the arms): via the southwest arms  
179 and via the northeast arms. For the TMT experiments one of the filter papers of the track was  
180 scented with 50  $\mu$ l 10% trimethylthiazoline (Contech). The advantage of trimethylthiazoline  
181 (TMT) is the absence of learning curve required for associative fear conditioning. The  
182 experimental protocol involving one TMT session with duration of 12 min was designed to  
183 evoke long-lasting (>24 hours) but weak place aversion response during the post-TMT  
184 recording session. The place aversion was measured only in the first 60 seconds of the post-  
185 TMT recording session. In the subsequent 11 minutes of the post-TMT recording session the  
186 animals displayed regular navigation in the TMT arms. This protocol allowed for sufficient  
187 number of passes, preventing an undersampling path measurement of the post-TMT  
188 navigation. During the TMT sessions the TMT filter papers were applied in all locations of the  
189 TMT arms for different rats; this protocol was designed to match the ChR2 protocol where the  
190 blue light was applied across all locations of the ChR2 arms. For the optic stimulation sessions,  
191 the laser was switched on when the animal entered the south arm or the west arm with  
192 continuous photostimulation trains (473 nm, 50 Hz, 5 ms pulse duration, 12 pulses per train,  
193 0.5 sec inter-train interval) until the animal exited this section of the track. The blue laser was  
194 synchronized with the video-tracking and with the recording system through hardware and  
195 DACQBASIC scripts (Axona. Ltd). The duration of each session (baseline, TMT, ChR2) was  
196 12 min. The TMT zone (ChR2 zone) included the TMT arms (ChR2 arms) and the feeding  
197 corners. For control experiments we used filter papers of the track scented with 50  $\mu$ l 10%  
198 ethanol, which was a familiar odor to the rats. The animals were habituated prior the recording  
199 sessions to the scent of ethanol.

## 200 *Clockwise and counter-clockwise place field analyses*

201 The rat's direction of movement was calculated for each tracker sample from the projection of  
202 the relative position of the LEDs onto the horizontal plane. The momentary angular  
203 displacement was calculated as the difference in the animal's position between successive 50  
204 Hz time samples. The direction time series was first smoothed by calculating a five-point  
205 running average. After smoothing, the instantaneous direction of movement was calculated as  
206 the angular displacement between successive points per time (Taube, 1995). To restrict the  
207 influence of inhomogeneous sampling on directional tuning, we separated the directionality for  
208 the pre-TMT(ChR2) and post pre-TMT(ChR2) where the animals exhibited consistent  
209 navigation, but not for the TMT(ChR2) sessions where the direction of animal's navigation  
210 was highly inconsistent due to the aversive episode. For the linear color-coded representation  
211 of the unidirectional place fields the firing rate was normalized for each cell to the cell's  
212 baseline maximal firing rate. The unidirectional clockwise / counter-clockwise place fields  
213 were defined as areas of 9 contiguous pixels ( $2.5 \text{ cm}^2 / \text{pixel}$ ) with average activity  $>10\%$  of  
214 the field maximum rate. Although the reduction of the place field firing rate cut-off to  $10\%$   
215 increases the extra-field noise this approach also preserves the peripheral spiking activity  
216 considered outside the place field with the  $20\%$  cut-off approach. The firing rate difference  
217 between the pre- TMT(ChR2) and post- TMT(ChR2) recordings was normalized by the ratio  
218 of the difference over the sum of the pre- and post-spiking count (see spike ratios).

## 219 *Optogenetic tools*

220 AAV-CaMKIIa-hChR2(H134R)-eYFP-WPRE-hGH viral construct was serotyped with AAV5  
221 coat proteins and packaged by Vector Core at the University of North Carolina with viral titers  
222 ranged from  $1.5\text{-}8 \times 10^{12}$  particles per mL. For control experiments we used virus bearing only  
223 the YFP reporter. Randomization of group allocation (ChR2 versus YFP controls) was  
224 performed using an online randomization algorithm (<http://www.randomization.com/>). The

225 virus injection was applied unilaterally in the BLA (2.4 AP, 4.9 ML), with volume of 2 $\mu$ l  
226 injected on two levels: 1 $\mu$ l at 6.5 mm and 1 $\mu$ l at 7.5 mm dorsoventral to the dura. Subsequently  
227 an optical fiber (200  $\mu$ m core diameter, Thorlabs, Inc.) was chronically inserted (2.4 AP, 4.9  
228 ML, 6.5 DV). Simultaneous optical stimulation and extracellular recording from CA1 were  
229 performed in freely-behaving rats 3 weeks after the surgery. The light power was controlled to  
230 be 10-15 mW at the fiber tip. Square-wave pulses of 5 ms were delivered at frequency of 50Hz.

### 231 *Spiking ratios*

$$232 \quad TMT \text{ spiking ratio} = \frac{\text{firing rate from the preTMT session in the TMT arms}}{\text{firing rate from the TMT session in the TMT arms}}$$

$$233 \quad NonTMT \text{ SR} = \frac{\text{firing rate from the preTMT session in the nonTMT zone}}{\text{firing rate from the TMT session in the nonTMT zone}}$$

$$234 \quad TMT / anti TMT \text{ passes ratio} = \frac{\text{Number of passes in the TMT arms}}{\text{Number of passes in the nonTMT arms}}$$

$$235 \quad ChR2 \text{ spiking ratio} = \frac{\text{firing rate from the preChR2 session in the ChR2 arms}}{\text{firing rate from the ChR2 session in the ChR2 arms}}$$

$$236 \quad NonChR2 \text{ SR} = \frac{\text{firing rate from the preChR2 session in the nonChR2 zone}}{\text{firing rate from the ChR2 session in the nonChR2 zone}}$$

$$237 \quad ChR2 / non ChR2 \text{ passes ratio} = \frac{\text{Number of passes in the ChR2 arms}}{\text{Number of passes in the nonChR2 arms}}$$

$$238 \quad Pre / post \text{ normalized spikes count} = \frac{(\text{spikes count pre} - \text{spikes count post})}{(\text{spikes count pre} + \text{spikes count post})}$$

### 239 *Center of Mass*

240 The center of mass (COM) was calculated by taking the  $x$  and  $y$  averages for the rows and  
241 columns of the rate map weighted for firing rate. For the unidirectional place field analyses  
242 COM included only the spikes located in the place field defined by the field area smaller than  
243 10% of the maximum firing rate, while for the bidirectional analyses we used all spikes with  
244 20% cut-off. The spatial position of the place cell was defined for all recorded spikes as the

245 center of mass of the firing rate distribution within the maze coordinates. The center of mass  
 246 of the place cells' spike distribution is calculated as follows:

$$247 \quad COM_x = \frac{\sum_{i=1}^{N_x} \sum_{j=1}^{N_y} f_{ij} \cdot i}{\sum_{i=1}^{N_x} \sum_{j=1}^{N_y} f_{ij}} \cdot l_{bin} - \frac{l_{bin}}{2}$$

$$248 \quad COM_y = \frac{\sum_{i=1}^{N_x} \sum_{j=1}^{N_y} f_{ij} \cdot j}{\sum_{i=1}^{N_x} \sum_{j=1}^{N_y} f_{ij}} \cdot l_{bin} - \frac{l_{bin}}{2}$$

249 Where  $N_x, N_y$  define the number of bins in the arena in X-, Y- direction;  $f_{i,j}$  is firing frequency  
 250 in bin  $i, j$ ;  $l_{bin}$  is the bin-size.

251 Given the origin O ( $O_x, O_y$ ), which denotes the northwest (SE) corner of the Cartesian  
 252 coordinate system, and the direction of the symmetry axis D ( $D_x, D_y$ ), which denotes the line  
 253 between the southwest (SW) and northeast (NE) corners, the distance of the COM  
 254 ( $COM_x, COM_y$ ) to the symmetry axis is calculated as follows:

$$255 \quad dist_{COM/sym} = \frac{\left| \det \begin{bmatrix} D_x - O_x & D_y - O_y \\ COM_x - O_x & COM_y - O_y \end{bmatrix} \right|}{\sqrt{(P_x - O_x)^2 + (D_y - O_y)^2}}$$

256 Where  $P$  is the shortest distance between the COM and the symmetry line. For the rectangular-  
 257 shaped linear track, the arena borders are defined as the square surrounding all motion tracking  
 258 sample points with an equal distance to the real limits of the arena at all sides.

259 Using  $dist_{COM}$  we calculate the distance between O and P as follows:

$$260 \quad \overline{OP} = \sqrt{(COM_x^2 + COM_y^2) - dist_{COM}^2}$$

261 The COM distance normalized by the arena width perpendicular to the symmetry axis through  
 262 the COM is calculated as:

$$263 \quad dist_{norm} = \begin{cases} \frac{dist_{COM}}{\overline{OP} \cdot C}, \overline{OP} < \frac{\overline{OM}}{2} \\ \frac{dist_{COM}}{(\overline{OM} - \overline{OP}) \cdot C}, \overline{OP} > \frac{\overline{OM}}{2} \end{cases}$$

264 Where  $\overline{OM}$  is the diagonal of a square enclosing all motion tracking data points, and  $C$  is a  
265 motion tracking data factor and in this case set to 0.85 for the linear rectangular track.

### 266 *Center of Mass Angle*

267 The Center of Mass Angle (COMa) computes the shift of place field COM towards the TMT  
268 arms using radial direction in degrees where the axis between the feeding zones denotes 45  
269 degrees. COMa is calculated as follows:

$$270 \quad \theta_{COM} = \begin{cases} 45^\circ \cdot (1 - dist_{norm}), & COM_x < COM_y \\ 45^\circ \cdot (1 + dist_{norm}), & COM_x > COM_y \end{cases}$$

271 Where  $\theta_{COM}$  is center of mass angle;  $COM_x, COM_y$  : X-, Y- coordinate of COM,  $dist_{norm}$   
272 normalized COM distance. The shift in the center of mass ( $\Delta COM$ ) is the absolute difference  
273 between the pre- and post-TMT(ChR2) recordings:

$$274 \quad |\Delta COM| = COM_{(pre-TMT)} - COM_{(post-TMT)}$$

$$275 \quad |\Delta COM| = COM_{(pre-ChR2)} - COM_{(post-ChR2)}$$

276 All algorithms were implemented in MATLAB.

### 277 *Histology*

278 At the end of the study, brains were removed for histological verification of electrode  
279 localization. Rats were deeply anesthetized with sodium pentobarbital (390 mg/kg) and  
280 perfused transcardially with ice-cold 0.9% saline followed by 4% paraformaldehyde. Brains  
281 were removed, post-fixed in paraformaldehyde for up to 24 hours and cryoprotected in 25%  
282 sucrose for >48 hours. Brains were sectioned coronally at 40 $\mu$ m on a freezing microtome.  
283 Primary antibody incubations were performed overnight at 4°C in PBS with BSA and Triton  
284 X-100 (each 0.2%). The concentration for primary antibodies was anti-CamKII $\alpha$  1:500  
285 (Millipore, # 05-532). Sections were then washed and incubated in PBS for 10 minutes and  
286 secondary antibodies were added (1:500) conjugated to Alexa Fluor 594 dye (Invitrogen, #  
287 A11032) for 2 hours at room temperature.



288 For visualization, the sections were mounted onto microscope slides in phosphate-buffered  
289 water and cover-slipped with Vectashield mounting medium. The YFP fluorescence was  
290 evaluated within a selected region that was placed below the fiber tip in an area of 1.5mm x  
291 1.5mm. Fluorescence was quantified based on the average pixel intensity within the selected  
292 region (Witten et al., 2011). The stained sections were examined with an Olympus IX81  
293 confocal microscope at 594nm for Alexa Fluor secondary antibody and 488nm for ChR2-YFP.  
294 CamKII $\alpha$ -positive neurons were identified based on the expression of red fluorescence,  
295 whereas ChR2-positive neurons were identified by the expression of green fluorescence. Co-  
296 localization of Alexa Fluor 594 and YFP was determined manually using ImageJ software.

### 297 *Statistical Analysis*

298 Two different approaches were used to calculate the sample size (Karalis et al., 2016). We  
299 performed power analyses to establish the required number of animals for experiments in which  
300 we had sufficient data on response variables. For experiments in which the outcome of the  
301 intervention could not be predetermined, we employed a sequential stopping rule. This  
302 approach allows null-hypothesis tests to be used subsequently by analyzing the data at different  
303 experimental stages using *t*-tests against Type II error. The experiment was initiated with four  
304 animals per group; if  $P < 0.05$ , the testing was continued with two or three more animals to  
305 increase statistical power. In the case of  $P > 0.36$ , the experiment was discontinued and the null  
306 hypothesis was accepted (Karalis et al., 2016). All data were analyzed using SPSS Software.  
307 Statistical significance was estimated by using a two-tailed independent samples *t*-test for non-  
308 paired data or a paired samples Student *t*-test for paired data. Repeated measures were  
309 evaluated with two-way analysis of variance (ANOVA) paired with *post hoc* Bonferroni test.  
310 Correlations between data sets were determined using Pearson's correlation coefficient. The  
311 probability level interpreted as significant was fixed at  $p < 0.05$ . Data are plotted as mean $\pm$ sem.  
312 Dataset of all experimental files is available at <https://doi.org/10.6084/m9.figshare.5336026.v1>

313

## 314 **Results**

### 315 **Increase of hippocampal beta amplitude parallels TMT-mediated aversion episodes**

316 To evoke an aversion episode for rats, chronically implanted with tetrodes in hippocampal CA1  
317 region, we used 10% trimethylthiazoline (TMT) applied to a restricted section (10x15 cm<sup>2</sup>) of  
318 a rectangular-shaped linear track (Fig. 1A). TMT, a constituent of fox urine, is an innately  
319 aversive odor to rodents (Myers and Rinaman, 2005; Kobayakawa et al., 2007). The  
320 experimental design consisted of three recording sessions (12 min each), conducted in the range  
321 of 48 hours: baseline recording (pre-TMT), recording with TMT located of one of the arms of  
322 the track (TMT) and subsequent recording without TMT (post-TMT). During the TMT session  
323 the animals (n = 12 rats) avoided to navigate across the TMT-scented section of the track (Fig.  
324 1B, Supplementary Movie 1), resulting in place avoidance (Fig. 1C, paired t-test, n = 12 rats,  
325  $t(11) = 10.4$ ,  $P < 0.001$ ). The experimental design of TMT aversion was designed to evoke in  
326 the post-TMT recording session only brief aversive response and subsequent extinction to  
327 avoid navigation undersampling in the TMT arms and to identify reliably the place cells' firing  
328 properties. The path sampling data of the pre- and post-TMT sessions show sufficient dwell  
329 time spent in both TMT- and non-TMT arms with sufficient path sampling for all rats (Fig. 1C,  
330 Table 1). The association of the TMT arms with the aversive odor was evident during the first  
331 minute of navigation in the post-TMT session (Fig. 1D, paired t-test, n = 12,  $t(11) = -4.244$ ,  $P$   
332 = 0.001). The average number of passes ( $2.58 \pm 0.3$ ) was significantly lower for the TMT arms  
333 compared to the non-TMT arms ( $5.16 \pm 0.7$ ). To identify if the olfaction-mediated aversion  
334 was restricted to the TMT section of the maze or if it was occurring over the entire recording  
335 arena we analyzed the amplitude of hippocampal beta frequency band (15-40Hz, Fig. 1E, Fig.  
336 1F) for each arm of the track (Fig. 1G). Successful odor discrimination is identified by  
337 hippocampal oscillations in beta frequency range (Igarashi et al., 2014) and therefore, the

338 increase of beta amplitude is a reliable indicator of aversive odors processing by the  
339 hippocampal network. The hippocampal beta amplitude (Fig. 1H, one-way ANOVA,  $n = 12$ ,  
340  $F_{(1,7)} = 3.1$ ,  $P = 0.005$ ) and frequency (Fig. 1I, one-way ANOVA,  $n = 12$ ,  $F_{(1,7)} = 3.8$ ,  $P = 0.002$ )  
341 expressed dependence on the animal's whole body linear speed. Concurrently, the TMT-  
342 induced aversion impacted the animals' linear speed (Supplementary Movie 1). To avoid the  
343 bias of speed on beta parameters we analyzed the effect of TMT on beta oscillations for  
344 different speed bands. The highest increase of beta amplitude was evident during the passes on  
345 the arm with TMT odor (TMT arm 1, Fig. 1J, two-way ANOVA with Bonferroni post-hoc test,  
346 between groups,  $n = 12$ ,  $F_{(2,10)} = 17.5$ ,  $P < 0.001$ ) with significant increase for five speed ranges.  
347 Significant beta amplitude increase was present also in the second arm between the food zones,  
348 adjacent to the TMT arm (TMT arm 2, Fig. 1K, two-way ANOVA with Bonferroni post-hoc  
349 test, between groups,  $F_{(2,10)} = 24.3$ ,  $P < 0.001$ ). The opposing loop between the food zones  
350 including non-TMT arm 1 and non-TMT arm 2 was characterized with non-significant changes  
351 of beta amplitude (Fig. 1L,M, two-way ANOVA with Bonferroni post-hoc test, between  
352 groups,  $n = 12$ , for non-TMT arm 1:  $F_{(2,10)} = 3.0$ ,  $P = 0.094$  and for non-TMT arm 2:  $F_{(2,10)} =$   
353  $1.3$ ,  $P = 0.295$ ). We found no significant effect of TMT on the frequency of beta oscillation  
354 (Fig. 1N, O, TMT arm 1: two-way ANOVA, between groups, with Bonferroni post-hoc  
355 correction,  $n = 12$ ,  $F_{(2,10)} = 0.7$ ,  $P = 0.493$ ; TMT arm 2:  $n = 12$ ,  $F_{(2,10)} = 1.2$ ,  $P = 0.349$ ; non-  
356 TMT arm 1:  $n = 12$ ,  $F_{(2,10)} = 2.1$ ,  $P = 0.164$ ; non-TMT arm 2:  $n = 12$ ,  $F_{(2,10)} = 1.8$ ,  $P = 0.213$ ).  
357 These data indicate that the effect of TMT on the hippocampal local field activity was restricted  
358 to two arms of the rectangular-shaped linear track (TMT arms).

359

360 **The place cell's activity in the TMT arms during aversion episodes correlates to the**  
361 **degree of field reconfiguration**

362 We next explored if the exposure to TMT increased remapping propensity of the place cells,  
363 measured by the shift of the center of mass ( $\Delta\text{COM}$ ) for all spikes.  $\Delta\text{COM}$  is an efficient  
364 approach for field plasticity evaluation because this parameter represents spiking as a function  
365 of the occupancy for each pixel and detects both spatial and rate remapping (Knierim, 2002;  
366 Lee et al., 2004). The average  $\Delta\text{COM}$  between the pre-TMT and post-TMT recordings for the  
367 place cells from the TMT group was  $12.44 \pm 0.8$  cm (Fig. 2A). This was a significant increase  
368 compared to the  $\Delta\text{COM}$ , examined from animals undergoing control recordings with  
369 indifferent odor: 10% ethanol, with baseline value of  $6.32 \pm 0.6$  cm (unpaired t-test, control  
370 group  $n = 57$ , TMT group  $n = 106$ ,  $t(161) = 5.2$ ,  $P < 0.001$ ). Furthermore, the ratio of the TMT-  
371 over non-TMT number of passes for the first 60 seconds significantly correlated to the degree  
372 of  $\Delta\text{COM}$  (Fig. 2B, Pearson's  $r = -0.656$ ,  $P = 0.020$ ,  $n = 12$ ). We investigated if the intra- and  
373 extra-field spiking activity of individual place cells during the TMT episodes (Fig. 2C) relates  
374 to subsequent shift of the place cell's center of mass angle ( $\Delta\text{COMa}$ ). This parameter estimates  
375 the proximity of the center of mass to the TMT zone across the main axis of the track (see  
376 Methods & Materials), between  $0^\circ$  for SW corner and  $90^\circ$  for NE corner. The TMT session  
377 induced variable  $\Delta\text{COMa}$  between the pre-TMT and post-TMT sessions for the NE group of  
378 animals (Fig. 2D) as well as for the SW group of animals (Fig. 2E). We correlated the degree  
379 of  $\Delta\text{COMa}$  to the change of the firing rate of the place cells within the TMT arms. The change  
380 of the firing rate was calculated by the ratio of the baseline over the TMT session firing rate  
381 from the recorded spikes. We found significant negative correlation between  $\Delta\text{COMa}$  and the  
382 TMT spiking ratio of the mean firing rate measured for the TMT arms (Fig. 2F, Pearson's  $r =$   
383  $-0.276$ ,  $P = 0.004$ ,  $n = 106$ ). Concurrently, no significance was evident for the correlation  
384 between  $\Delta\text{COMa}$  and the non-TMT mean spiking ratio measured from the non-TMT zone (Fig.  
385 2G, Pearson's  $r = -0.016$ ,  $p = 0.871$ ,  $n = 107$ ). Similarly, the correlation between  $\Delta\text{COMa}$  and  
386 the spiking ratio of the peak firing rate was significant for the TMT arms (Fig. 2H, Pearson's  $r$

387 = -0.271,  $P = 0.005$ ,  $n = 106$ ), but not for the non-TMT zone (Fig. 2I, Pearson's  $r = -0.083$ ,  $P$   
388 = 0.394,  $n = 107$ ). In the control group of rats (Fig. 3A,B) we found no significant correlation  
389 between  $\Delta\text{COMa}$  (Fig. 3C,D) and the mean spiking ratio for the ethanol arms (Fig. 3G,  
390 Pearson's  $r = -0.001$ ,  $P = 0.997$ ,  $n = 31$ ) and for the non-ethanol zone (Fig. 3H, Pearson's  $r = -$   
391 0.041,  $P = 0.822$ ,  $n = 32$ ). The correlations between  $\Delta\text{COMa}$  and peak spiking ratios were also  
392 non-significant (3I, Pearson's  $r = -0.092$ ,  $P = 0.621$ ,  $n = 31$ ; Fig. 3J, Pearson's  $r = -0.062$ ,  $P =$   
393 0.734,  $n = 32$ ). These data demonstrate that the cells' spiking during aversive episodes is related  
394 to subsequent place field remapping.

395

### 396 **The extra-field spiking during aversion episodes determines the degree of field plasticity**

397 We compared the field reconfiguration of the place cells with fields located in the TMT arms  
398 (with spiking ratio including intra-field spikes, Fig. 4A) to the remapping of the cells with place  
399 fields outside the TMT arms (with spiking ratio including only extra-field spikes, Fig. 4B). The  
400 place field was defined as the region of the arena in which the firing rate of the place cell was  
401  $> 20\%$  of the peak firing frequency (Brun et al., 2002). The extra-field TMT spiking ratio highly  
402 correlated to  $\Delta\text{COMa}$  for both the mean (Fig. 4E, Pearson's  $r = -0.465$ ,  $P < 0.001$ ,  $n = 54$ ) and  
403 for the peak firing rate (Fig. 4I, Pearson's  $r = -0.453$ ,  $P < 0.001$ ,  $n = 54$ ). However, the intra-  
404 field TMT spiking ratio showed no significant correlation to  $\Delta\text{COMa}$  for the mean firing rate  
405 (Fig. 4F, Pearson's  $r = 0.013$ ,  $P = 0.925$ ,  $n = 52$ ) as well as for the peak firing rate (Fig. 4J,  
406 Pearson's  $r = -0.055$ ,  $P = 0.698$ ,  $n = 52$ ). The dissociation of the spikes into TMT extra- and  
407 intra-field groups had no effect on the place cells activity outside the TMT arms during the  
408 TMT sessions. No significant correlation was evident for the mean and peak firing rate of the  
409 intra- (Fig. 4G, Pearson's  $r = -0.024$ ,  $P = 0.864$ ,  $n = 55$ ; Fig. 4K, Pearson's  $r = -0.119$ ,  $P =$   
410 0.387,  $n = 55$ ) and extra-field spikes (Fig. 4H, Pearson's  $r = 0.027$ ,  $P = 0.852$ ,  $n = 52$ ; Fig. 4L,  
411 Pearson's  $r = 0.062$ ,  $P = 0.661$ ,  $n = 52$ ) in the non-TMT zone. These results show that the

412 degree of increase in extra-field spiking during the TMT sessions predicts the degree of place  
413 field plasticity. Furthermore, the degree of increase extra-field spiking of these place cells  
414 during the TMT sessions predicted the degree of place field remapping.

415

#### 416 **The center of mass shift occurs in both directions of navigation along the track**

417 We next aimed to precisely identify the degree of place field COM shift between recording  
418 sessions. The angle calculation of COM in 2D space is prone to higher variability compared to  
419 the one-directional COM calculation since the distance covered per unit angle varies as a  
420 function of the radial distance. For this purpose we computed the degree of field remapping  
421 and firing rate remapping after the path of the animals was linearized (Fig. 5). Place fields on  
422 linear tracks display differential firing depending on the direction of the animal's movement  
423 (McNaughton et al., 1983). Thus, we also separated the place fields into clockwise and counter-  
424 clockwise trajectories (Fig. 5A,C,E Fig. 5B,D,F). For the unidirectional place fields we used  
425 an alternative place field cut-off, which includes the field bins with firing rate greater than 10%  
426 of the maximum firing rate (see Methods & Materials). We compared the spiking parameters  
427 of the place fields between: 1) pre-ethanol session (Fig. 5A,B left panels) and post-ethanol  
428 session (Fig. 5A,B right panels); between 2) pre-TMT session for the SW group (Fig. 5C,D left  
429 panels) and post-TMT session (Fig. 5C,D right panels), and between 3) pre-TMT session for  
430 the NE group (Fig. 5E,F left panels) and post-TMT session (Fig. 5E,F right panels). There was  
431 no significant difference in the change of the mean firing rate between the ethanol, TMT-NE  
432 and TMT-SW groups for the clockwise (Fig. 5G, one-way ANOVA with Bonferroni post-hoc  
433 correction,  $n = 6$ ,  $F_{(2,128)} = 0.257$ ,  $P = 0.773$ ) and counter-clockwise groups (Fig. 5J, one-way  
434 ANOVA with Bonferroni post-hoc correction,  $n = 6$ ,  $F_{(2,118)} = 0.164$ ,  $P = 0.849$ ). Similarly, the  
435 change of the peak firing rate between the three groups was not significant for the clockwise  
436 (Fig. 5H, one-way ANOVA with Bonferroni post-hoc correction,  $n = 6$ ,  $F_{(2,128)} = 0.886$ ,  $P =$

437 0.886) or for counter-clockwise fields (Fig. 5K, one-way ANOVA with Bonferroni post-hoc  
438 correction,  $n = 6$ ,  $F_{(2,118)} = 0.118$ ,  $P = 0.889$ ). The linearized COM shifted on average with  $5.10$   
439  $\pm 0.5$  cm for the clockwise- (Fig. 5I) and  $5.37 \pm 0.5$  cm for the counter-clockwise fields (Fig.  
440 5L) in the ethanol-exposed group. Exposure to TMT evoked  $\Delta$ COM of  $24.24 \pm 4.6$  cm for  
441 clockwise- and  $24.47 \pm 4.4$  cm for counter-clockwise fields for the TMT-NE group, and  $21.84$   
442  $\pm 3.3$  cm for clockwise- (Fig. 5I) and  $24.65 \pm 4.0$  cm for counter-clockwise fields (Fig. 5L) for  
443 the TMT-SW group. This shift was significantly higher compared to the control group for  
444 clockwise- (one-way ANOVA with Bonferroni post-hoc correction,  $n = 6$ ,  $F_{(2,128)} = 11.52$ ,  $P <$   
445  $0.001$ ) and counter-clockwise fields (one-way ANOVA with Bonferroni post-hoc correction,  
446  $n = 6$ ,  $F_{(2,118)} = 10.105$ ,  $P < 0.001$ ). These data show that TMT evokes potent field remapping  
447 and negligible rate remapping for both directions of navigation.

448

#### 449 **BLA photostimulation mediates aversion-triggered shift of the center of mass**

450 Basolateral amygdala (BLA) activation is known to trigger aversive behavior (Davis, 1992).  
451 We investigated if BLA innervation of hippocampal place cells mediates the aversion induced  
452 field plasticity and if optogenetic activation BLA excitatory neurons will exert an effect similar  
453 to the TMT-evoked pattern of reconfiguration. To exert spatial control of the BLA neuronal  
454 activity we injected a viral construct AAV-CaMKII $\alpha$ -hChR2-YFP in the BLA of Lister-  
455 Hooded rats (Fig. 6A). Delivery of blue light (473 nm) excited the spiking of neurons infected  
456 with AAV-CaMKII $\alpha$ -hChR2-YFP (Fig. 6B,C) and induced concurrently aversive behavior  
457 (Supplementary Movies 2, 3). The majority of the photostimulated BLA neurons were  
458 CamKII $\alpha$ -positive:  $87 \pm 8\%$  of neurons that expressed yellow fluorescent protein (YFP) also  
459 expressed CamKII $\alpha$ , while  $64 \pm 5\%$  of neurons that expressed CamKII $\alpha$  also expressed YFP.  
460 We applied optogenetic stimulation (50Hz, trains of 12 pulses, 0.5Hz inter-train interval) in  
461 south and west arms of the track (ChR2 arms, Fig. 6D) and observed place avoidance in the



462 ChR2 arms (Fig. 6E, paired t-test,  $n = 6$  rats,  $t(5) = 5.0$ ,  $P = 0.004$ ). The post-ChR2 session  
463 recollected the place aversion of the animals in the first minute of the recording (Fig. 6F, paired  
464 t-test,  $n = 6$ ,  $t(5) = -3.796$ ,  $p = 0.013$ ). BLA photostimulation affected the synchronization of  
465 hippocampal local field oscillations across the stimulation trials (Fig. 6G), where the power of  
466 the event-related potential increased in the range of 5 – 8 Hz (Fig. 6H). The phase-locking  
467 value is a parameter that measures the degree of local field synchrony between all stimulation  
468 epochs (see Materials & Methods). The phase-locking values were significantly higher for  
469 BLA light pulse delivery (Fig. 6I,  $0.35 \pm 0.04$ ) compared to the shuffled BLA data ( $0.09 \pm 0.07$ ,  
470 paired t-test,  $n = 120$  trials,  $t(119) = 3.0$ ,  $P = 0.005$ ), as well as compared to the control YFP  
471 group ( $0.01 \pm 0.06$ , unpaired t-test,  $n = 120$  trials,  $t(118) = 4.8$ ,  $P = 0.009$ ). We next compared  
472 the change of the intra-field and extra-field spiking of place cells that fire in both ChR2-arms  
473 and non-ChR2 zone. The spike count was examined in epochs of 100, 250, and 500ms pre- and  
474 post-BLA stimulation protocol onset. The positive value of the normalized count ( $0.03 \pm 0.03$ )  
475 showed that the activation of the amygdala afferents resulted in a tendency of decreased intra-  
476 field spiking rate in the first 100ms post-BLA photostimulation (Fig. 6J). Concurrently, the  
477 extra-field spiking increased (represented by the negative value of the normalized count,  $-0.11$   
478  $\pm 0.04$ ), which was significantly different from the extra-field normalized count for the first  
479 100ms (paired t-test,  $n = 74$  cells,  $t(73) = 3.2$ ,  $P = 0.002$ ), but not the 250ms (paired t-test,  $n =$   
480  $74$  cells,  $t(73) = 1.1$ ,  $P = 0.254$ ) and 500ms post-BLA photostimulation (paired t-test,  $n = 74$   
481 cells,  $t(73) = 1.2$ ,  $P = 0.247$ ). We compared the COM angle shift ( $\Delta\text{COMa}$ ) between the pre-  
482 and post-ChR2 sessions for the place cells with fields located in the ChR2 arms (with intra-  
483 field spikes) and for the place cells with fields located in the non-ChR2 zone (with extra-field  
484 spikes only). The average  $\Delta\text{COMa}$  of  $7.57 \pm 1.1$  from cells with fields located in the ChR2  
485 arms was significantly lower than  $\Delta\text{COMa}$  of  $12.64 \pm 1.6$  from cells located in the non-ChR2  
486 zone (Fig. 6K, unpaired t-test, extra-field group,  $n = 38$  cells, intra-field group,  $n = 42$  cells,



487  $t(78) = 5.0, P = 0.011$ ).  $\Delta\text{COMa}$  for the extra-field spiking cells also differed significantly  
488 between the ChR2- and YFP control group of rats (unpaired t-test, ChR2 extra-field group,  $n$   
489 = 38 cells, YFP extra -field group,  $n = 32$  cells,  $t(68) = 5.3, P = 0.010$ ). The application of  
490 AAV-CaMKII $\alpha$ -YFP in control rats (Fig. 7A) evoked no behavioral response (Fig. 7D,E,  
491 paired t-test,  $n = 6$  rats,  $t(5) = 1.0, P = 0.358$ ), electrophysiological response (Fig. 7B,C,F-H)  
492 or remapping (Fig. 8A,B). These data confirm BLA photoactivation as a reliable experimental  
493 protocol for behavioral place aversion and place field plasticity.

494

#### 495 **The extra-field spiking during BLA photostimulation predicts the center of mass shift**

496 Place fields of the cells located in the non-ChR2 zone that spiked during the photostimulation  
497 session (Fig. 9) showed larger place field reconfiguration (Supplementary Movie 4), compared  
498 to the cells with little or no spiking activity (Fig. 10). We correlated the COM angle shift  
499 ( $\Delta\text{COMa}$ ) to the ratio of the baseline over the TMT session place cells' firing rate from the  
500 recorded spikes (ChR2 spiking ratio) for the place cells with fields located in the non-ChR2  
501 zone (with extra-field spikes) as well as for the place cells located in the ChR2 arms (with intra-  
502 field spikes, Fig. 11A). The mean and the peak extra-field ChR2 spiking ratios significantly  
503 correlated to  $\Delta\text{COMa}$  (Fig. 11C, Pearson's  $r = -0.429, P = 0.007$ ; Fig. 11G, Pearson's  $r = -$   
504  $0.426, P = 0.009, n = 38$ ). Concurrently, the mean and the peak intra-field ChR2 spiking ratio  
505 showed weak non-significant correlation to  $\Delta\text{COMa}$  for the ChR2 arms (Fig. 11D, Pearson's  $r$   
506 =  $-0.261, P = 0.099$ ; Fig. 11H, Pearson's  $r = -0.187, P = 0.241, n = 41$ ). No significant  
507 correlation to  $\Delta\text{COMa}$  was evident for the mean and peak firing rate of the intra- (Fig. 11E,  
508 Pearson's  $r = 0.092, P = 0.530, n = 49$ ; Fig. 11I, Pearson's  $r = 0.066, P = 0.651, n = 49$ ) and  
509 extra-field spikes (Fig. 11F, Pearson's  $r = 0.099, P = 0.529, n = 42$ ; Fig. 11J, Pearson's  $r =$   
510  $0.032, P = 0.842, n = 42$ ) for the non-ChR2 zone. Similarly to the TMT protocol, the BLA  
511 photostimulation evoked significant correlation between the spiking ratio and  $\Delta\text{COMa}$  only for

512 the Chr2 arms and only for the extra-field spiking cells. These data validate the hypothesis  
513 that aversion-evoked place field reconfiguration is mediated by BLA activation.

514

515 **The unidirectional field shift after BLA photostimulation is similar to the TMT-induced**  
516 **remapping**

517 We compared the spiking parameters of the place fields between pre-YFP session (Fig. 12A,B  
518 left panels) and post-YFP session (Fig. 12A,B right panels), as well as pre-ChR2 session (Fig.  
519 5C,D left panels) and post-ChR2 session (Fig. 12C,D right panels) of the BLA-photostimulated  
520 group. There was no significant difference in the change of the mean firing rate between the  
521 YFP and ChR2 groups for the clockwise (Fig. 12E, one-way ANOVA with Bonferroni post-  
522 hoc correction,  $n = 6$ ,  $F_{(1,122)} = 0.269$ ,  $P = 0.847$ ) and counter-clockwise groups (Fig. 12H, one-  
523 way ANOVA with Bonferroni post-hoc correction,  $n = 6$ ,  $F_{(1,112)} = 0.278$ ,  $P = 0.810$ ). No  
524 significance was evident for the change of the peak firing rate between both groups for the  
525 clockwise (Fig. 12F, one-way ANOVA with Bonferroni post-hoc correction,  $n = 6$ ,  $F_{(1,122)} =$   
526  $0.266$ ,  $P = 0.850$ ) and for counter-clockwise fields (Fig. 12I, one-way ANOVA with Bonferroni  
527 post-hoc correction,  $n = 6$ ,  $F_{(1,112)} = 0.126$ ,  $P = 0.816$ ). The linearized  $\Delta$ COM was  $5.66 \pm 1.1$   
528 cm for the clockwise- (Fig. 5G) and  $5.61 \pm 1.1$  cm for the counter-clockwise fields (Fig. 5J) in  
529 the YFP group, while light delivery to BLA induced  $\Delta$ COM of  $24.60 \pm 4.6$  cm for clockwise-  
530 and  $24.10 \pm 3.0$  cm for (counter-clockwise fields one-way ANOVA with Bonferroni post-hoc  
531 correction,  $n = 6$ ,  $F_{(1,122)} = 12.01$ ,  $P < 0.001$ ; counter-clockwise fields one-way ANOVA with  
532 Bonferroni post-hoc correction,  $n = 6$ ,  $F_{(1,112)} = 11.07$ ,  $P < 0.001$ ). These data show that  
533 similarly to TMT, BLA excitation results in strong field but insignificant rate remapping for  
534 both directions of navigation.

535

536

## 537 **Discussion**

538 In this study, we demonstrated the reconfiguration pattern of hippocampal place cells evoked  
539 by aversive episodes. We report that the place fields located outside the area of aversion express  
540 higher propensity for center of mass shift, compared to the fields located with the arms of the  
541 track associated with TMT-induced aversion. Our findings show for the first time that the  
542 degree of center of mass shift correlates with the firing rate of the extra-field spiking during  
543 the aversion. Optogenetic stimulation of extra-field spikes resulted in the same reconfiguration  
544 pattern with the exposure to innately aversive odor.

545

## 546 **Beta amplitude increase displays the spatial location of aversive odor perception**

547 The hippocampus is proposed to provide a contextual framework for the encoding of emotional  
548 events (Leutgeb et al., 2005). Recent data demonstrate that hippocampal spatial representation  
549 is not static but alters in response to non-spatial rewarding stimuli (Mamad et al., 2017).  
550 Hippocampal place cells remap also after exposure to stressful or fearful events (Moita et al.,  
551 2004; Wang et al., 2012; Kim et al., 2015; Wang et al., 2015). This remapping is a mechanism  
552 for the formation of new hippocampal engrams that store the association of spatial context and  
553 fearful experience (Ramirez et al., 2013; Tonegawa et al., 2015). Although a population of  
554 place cells remap after exposure to stressful or fearful events (Moita et al., 2004; Kim et al.,  
555 2015), there is no clear explanation why some neurons alter their place fields to encode fearful  
556 experience, while others preserve stable fields. The application of innate aversive  
557 trimethylthiazoline (TMT) allowed us to study the transformation of hippocampal population  
558 code from indifferent to negative context value for a single environment. The advantage of  
559 TMT is the absence of learning curve required for associative fear conditioning (Kobayakawa  
560 et al., 2007) and the absence of visible or tactile features of the stressor that might affect the  
561 stability of the recorded place cells (Jeffery and O'Keefe, 1999). Beta rhythm (15 – 40 Hz) is a

562 characteristic oscillation in the olfactory bulb during odorant perception (Lowry and Kay,  
563 2007; Lepousez and Lledo, 2013). During olfactory-driven behavior beta oscillations sustained  
564 long-range interactions between distant brain structures, including the hippocampus (Martin et  
565 al., 2007). We measured beta oscillations to identify in which arms of the track the animals  
566 perceive the aversive odorant. This approach allowed us to distinguish whether TMT odor was  
567 processed by the hippocampal formation of the animals only for particular arms or for the entire  
568 rectangular-shaped linear track. Entorhinal–hippocampal coupling was observed specifically  
569 in the 20 – 40 Hz frequency band as rats learned to use an odor cue to guide navigational  
570 behavior (Igarashi et al., 2014). The essence of beta rhythm in the processing of aversive stimuli  
571 across the limbic circuitry was demonstrated with the finding that powerful beta activity  
572 predicted the behavioral expression of conditioned odor aversion (Chapuis et al., 2009).  
573 Similarly, we showed that beta amplitude increased during the TMT sessions, particularly in  
574 the TMT arms but not in the rest of the track. We revealed here that beta rhythm varied as a  
575 function of speed: the frequency of beta decreased, while the amplitude increased with the  
576 augmentation of the whole body motion of the animal. The frequency dependence on the speed  
577 of locomotion is not characteristic only for the beta frequency band but also for slower and  
578 faster local field oscillations. Increase of gamma frequency was linked to faster running speed  
579 in rats (Ahmed and Mehta, 2012) and this phenomenon was proposed to preserve the spatial  
580 specificity of place cells at different running speeds (Ahmed and Mehta, 2012). Further  
581 research is needed to clarify the source of the currents underpinning beta. Particularly  
582 intriguing is the open question of how the hippocampal pyramidal cells discharge in relation to  
583 beta phase during the onset of aversive experience. We need to elucidate the temporal link  
584 between beta and theta, as well beta and gamma during the perception of aversive stimuli.

585

586 **Aversion experience reconfigures hippocampal place fields**

587 After we identified the TMT arms as a section of the maze where the animals perceived the  
588 aversive stimulus, we compared the hippocampal spatial representation across the track axis,  
589 dissociating the TMT arms against the opposing arms. The reconfiguration of individual place  
590 fields is best evaluated by the center of mass difference (Knierim, 2002). We found that place  
591 fields from animals exposed to aversive TMT evoked higher center of mass change compared  
592 to control animals. Exposure to predator odor produces only partial remapping and one  
593 possibility is that the cells remaining stable encode visuospatial information, while the  
594 remapping cells are sensitive to other contextual cues such as olfactory information and/or  
595 emotional valence (Wang et al., 2012). Another possibility is that spatial or temporal proximity  
596 of the neuronal activity to the perception of the aversive episode determines which place fields  
597 reconfigure. To show that the spatial proximity to the olfactory stimulus was essential  
598 component of the field plasticity we compared the correlation between the change of the center  
599 of mass angle ( $\Delta\text{COMa}$ ) and TMT spiking ratio within the TMT arms versus outside the TMT  
600 arms (non-TMT zone). We used  $\Delta\text{COMa}$  as analytical tool to evaluate the displacement of  
601 place fields in relation to aversive event and to measure the change of their spatial proximity  
602 to the TMT arms. Surprisingly, we found that the first group (including intra-field spikes)  
603 showed no significant correlation, while the second group (including only extra-field spikes)  
604 demonstrated high correlation of the spiking activity with the degree of center of mass shift.  
605 No significant correlation was evident between  $\Delta\text{COMa}$  and intra- or extra-field spiking ratio  
606 for the non-TMT zone of the track. Although information on the contribution of extra-field  
607 spikes to spatial navigation is lacking in the literature, we know that their activity is crucially  
608 involved in hippocampus-dependent learning (Ferguson et al., 2011). The significance of the  
609 extra-field spikes is largely associated to the sharp-wave ripple replay of recently navigated  
610 locations and experiences (Wu et al., 2017), which are important in learning and memory  
611 consolidation during inactive behavioural state (Johnson et al., 2009). However, extra-field

612 spikes from place cells have been shown to occur during active navigation (Johnson and  
613 Redish, 2007; Epsztein et al., 2011). Here, we present evidence that the extra-field activity  
614 encodes salient stimuli and if it is potent enough to evoke place field plasticity related to  
615 experience-dependent learning. The TMT protocol allows for instant association between the  
616 aversive episode and spatial location, which is easily detected by the avoidance behaviour and  
617 validated by the beta rhythm amplitude. The advantage of a snapshot aversion episode is the  
618 robust change of the place cells spiking inside and outside their place fields.

619 Not only aversion but also reward and novelty salient stimuli can trigger biased field  
620 distribution (Fyhn et al., 2007). Our experimental design included two feeding locations.  
621 Therefore, these may have contributed to the observed remapping. The delivery of sugar pellets  
622 ensured continuous navigation for 12 minutes for each recording session. To reduce the effect  
623 of the reward on the place field remapping we habituated the rats to the feeding locations. The  
624 animals were consistently rewarded throughout the baseline (pre-) recordings, TMT/ethanol or  
625 YFP/ChR2 recordings and subsequent (post-) recordings for all groups of animals. The  
626 unidirectional field analysis revealed that TMT or ChR2 groups of rats revealed significantly  
627 greater shift in COM (increased  $\Delta$ COM) compared to the ethanol or YFP groups, respectively.  
628 The observed field plasticity was field but not rate remapping. However, this result does not  
629 rule out the possibility that this plasticity results from a change in reward value due to TMT  
630 exposure rather than the mere effect of conditioned aversion. A study in behaving rats showed  
631 that a decrease in lever pressing for food in the presence of a conditioned tone also led to  
632 changes in firing rate in areas associated with fear learning (Sotres-Bayon et al., 2012).  
633 Therefore, the perception of known reward value may change due to conflict between aversion  
634 and reward. We must acknowledge the likelihood that the COM shift observed in the non-TMT  
635 (non-ChR2) arms may be the result of conflict between the rewarding and aversive stimuli.  
636 Another factor that can affect place field variability is the speed of navigation. Although the

637 post-TMT(ChR2) sessions were characterized with reduced navigation during the first two  
638 minutes, the animals navigation recovered for the remaining 10 minutes. This is of sufficient  
639 duration for the reliable formation of stable fields (Frank et al., 2004). Concurrently, we  
640 excluded spikes that occurred during epochs with running speeds below 5 cm/s (Alme et al.,  
641 2014).

642

### 643 **Amygdala mediates aversion-induced shift of the place field center of mass**

644 The amygdala is a key structure in the acquisition of aversive experience (LeDoux, 2000) and  
645 optogenetic stimulation of BLA mediates associative fear learning (Johansen et al., 2010;  
646 Klavir et al., 2017). The amygdala sets the emotional valence of sensory stimuli (Phelps and  
647 LeDoux, 2005; Moriceau et al., 2006) and the BLA circuitry is particularly involved in the  
648 odor-evoked fear conditioning (Wallace and Rosen, 2001; Anderson et al., 2003; de Araujo et  
649 al., 2003). The amygdala is critical for stress-induced modulation of hippocampal synaptic  
650 plasticity and hippocampus-dependent learning (Kim et al., 2001; Vouimba and Richter-Levin,  
651 2005). Aversion-triggered place cell remapping is blocked by amygdala inactivation (Donzis  
652 et al., 2013; Kim et al., 2015), while BLA stimulation decreases the stability of CA1 place  
653 fields (Kim et al., 2012). Despite recent advances in manipulating engrams (Cai et al., 2016;  
654 Rashid et al., 2016), there is no agreement if the place cells remap randomly or their  
655 reconfiguration depends on the location of the aversive stimulus perception. We found that the  
656 BLA-triggered field plasticity pattern was equivalent to the TMT-induced field  
657 reconfiguration, namely, the correlation between the ChR2 spiking ratio and  $\Delta\text{COMa}$  was  
658 significant only for place cells located outside the ChR2 arms. The non-ChR2 zone included  
659 non-ChR2 arms and the feeding zones. Elimination of the feeding zones from the data analyses  
660 would have excluded spikes from intra- or extra-field activity, affecting the reliability of the  
661 place field center of mass calculation and the accuracy of field plasticity identification. The

662 observed field reconfiguration pattern reveals that the increase of extra-field but not intra-field  
663 spiking during aversive episode predicts the change in the preferred firing location. Such  
664 response can emerge after a small, spatially uniform depolarization (Rickgauer et al., 2014) of  
665 the spatially untuned somatic membrane potential of inactive place cell leads to the sudden and  
666 reversible emergence of a spatially tuned subthreshold response and novel place field formation  
667 (Lee et al., 2012; Bittner et al., 2015). This phenomenon is proposed as a key mechanism for  
668 the formation of hippocampal memory representations (Lee et al., 2012). Our data complement  
669 these findings by showing that BLA stimulation increases only the extra-field but not the intra-  
670 field spiking of the CA1 place cells. It is very likely that extra-field spikes might be highly-  
671 susceptible to hippocampal inputs and these spikes mediate spike-timed synaptic plasticity that  
672 results in relocation of the place fields' center of mass. Therefore, our data analyses were not  
673 restricted only to the main place field, but included also the identification of the extra-field  
674 spikes. Early studies showed that amygdala can regulate the induction of hippocampal synaptic  
675 plasticity, where the population spike long-term potentiation in the dentate gyrus was  
676 attenuated by lesion of the BLA (Ikegaya et al., 1994) or by pharmacological inactivation of  
677 BLA (Ikegaya et al., 1995). Priming the BLA inputs 30 seconds prior to performant path  
678 stimulation resulted in the facilitation of the excitatory post-synaptic potentials in the dorsal  
679 hippocampus (Akirav and Richter-Levin, 1999). Thus, BLA modulates the synaptic plasticity  
680 within the hippocampal formation where the amygdala and the hippocampus acts  
681 synergistically to form long-term memories of emotional events. The dual activation of the  
682 amygdala and the hippocampus and the cross-talk between is proposed to provide contextual  
683 information to emotionally based memories (Richter-Levin and Akirav, 2000). The dorsal  
684 hippocampus is believed to associate context and fear memories (Ryan et al., 2015; Tonegawa  
685 et al., 2015) and our data suggest that this process can be detected in the spatial firing patterns  
686 of the place cells, which shift their center of mass towards the aversive section of the



687 environment. While our experimental design involves brief aversion retrieval (during the first  
688 minute of the post-TMT/ChR2 sessions) followed by aversion extinction, the observed field  
689 reconfiguration may be specific for the extinction phase. The place field remapping pattern  
690 between the retrieval and extinction may differ (Wang et al., 2015), however, the long-term  
691 measurement of place cell activity during aversion retrieval is challenging due to the risk of  
692 navigation undersampling which is a reason for incomplete formation of place fields *per se* and  
693 invalidates the evaluation of their properties (Hok et al., 2012; Navratilova et al., 2012).

694

### 695 **Contextual signalling across the hippocampal formation**

696 Although the physiology of dorsal hippocampus is regulated by the aversive amygdalar signals  
697 it is still unclear which is the most direct anatomical route from BLA to dorsal hippocampus.  
698 The most substantial projection to the hippocampus originates in the basal nucleus and the  
699 caudomedial portion of BLA projects heavily to the stratum oriens and stratum radiatum of  
700 hippocampal CA3 and CA1 with predominant innervation of the ventral hippocampus  
701 (Pikkarainen et al., 1999). Thus, the BLA-dorsal hippocampus signal transmission most likely  
702 follows indirect polysynaptic route via the ventral hippocampus (Amaral and Witter, 1989).  
703 Lesions of the longitudinal hippocampal pathways demonstrated the functional significance of  
704 ventro-dorsal projections in spatial memory formation (Steffenach et al., 2002). Ventral  
705 hippocampus is known also to mediate contextual conditioning where ventral hippocampal  
706 lesions disrupt contextual freezing (Maren and Holt, 2004; Orsini et al., 2011; Kim and Cho,  
707 2017), but see (Huff et al., 2016). Furthermore, studies *in vivo* have shown that cells in the  
708 ventral region provide contextual information (Komorowski et al., 2013) and ventral cells  
709 respond to odors much more strongly than dorsal cells (Keinath et al., 2014). This line of  
710 research reveals the role of ventral hippocampus in fear and contextual conditioning and  
711 suggests that aversive signals may propagate across the hippocampal longitudinal axis towards

712 dorsal hippocampus that mediates spatial learning. We found that BLA photostimulation  
713 triggered potent oscillatory response in dorsal hippocampus represented by ERPs  
714 synchronization after the light pulse delivery and increased power in the range of 5 – 8 Hz. The  
715 firing of the hippocampal neurons also changed with higher occurrence of extra-field spikes  
716 100 ms after the photostimulation, although we did not find hippocampal spikes that were  
717 directly entrained by the light pulses. The electrophysiological data presented in our manuscript  
718 report functional relation between the amygdala and dorsal hippocampus, but our histological  
719 data were insufficient to conclude whether this effect was mediated by the major indirect  
720 ventral projections or by sparse direct dorsal projections. Therefore, we consider that the  
721 indirect ventral pathway as the most likely anatomical route that mediated the observed  
722 amygdalo-hippocampal signalling. Spike-timed depolarization may underline not only the  
723 encoding of aversive but also of rewarding or salient stimuli mediated by the subcortical or  
724 entorhinal projections to hippocampus (Harvey et al., 2009).

725 We report here that BLA-induced field remapping follows the place field plasticity patterns  
726 after aversive experience, evoked with exposure to TMT. Our data should be also considered  
727 in the context of two possible conditions: 1) the remapping patterns may occur not only as a  
728 result of the TMT or ChR2 protocol but also due to conflict between the rewarding and aversive  
729 stimuli, and 2) the plasticity of dorsal hippocampal place cells may be mediated via different  
730 indirect pathways arising from BLA. We propose that this pattern of field reconfiguration  
731 serves as a universal mechanism for the generation of multiple context-dependent  
732 representations by different salient stimuli, where the animal's behavior is guided by the  
733 contextual valence of previous experience.

734

735

736

737

## 738 **References**

739

- 740 Ahmed, O.J., Mehta, M.R. (2012). Running speed alters the frequency of hippocampal gamma  
741 oscillations. *J Neurosci* 32:7373-7383. doi:10.1523/JNEUROSCI.5110-11.2012.
- 742 Akirav, I., Richter-Levin, G. (1999). Priming stimulation in the basolateral amygdala  
743 modulates synaptic plasticity in the rat dentate gyrus. *Neurosci Lett* 270:83-86.
- 744 Alme, C.B., Miao, C., Jezek, K., Treves, A., Moser, E.I., Moser, M.B. (2014). Place cells in  
745 the hippocampus: eleven maps for eleven rooms. *Proc Natl Acad Sci U S A* 111:18428-  
746 18435. doi:10.1073/pnas.1421056111.
- 747 Amaral, D.G., Witter, M.P. (1989). The three-dimensional organization of the hippocampal  
748 formation: a review of anatomical data. *Neuroscience* 31:571-591.
- 749 Anderson, A.K., Christoff, K., Stappen, I., Panitz, D., Ghahremani, D.G., Glover, G., Gabrieli,  
750 J.D., Sobel, N. (2003). Dissociated neural representations of intensity and valence in  
751 human olfaction. *Nat Neurosci* 6:196-202. doi:10.1038/n1001.
- 752 Bittner, K.C., Grienberger, C., Vaidya, S.P., Milstein, A.D., Macklin, J.J., Suh, J., Tonegawa,  
753 S., Magee, J.C. (2015). Conjunctive input processing drives feature selectivity in  
754 hippocampal CA1 neurons. *Nat Neurosci* 18:1133-1142. doi:10.1038/nn.4062.
- 755 Brun, V.H., Otnaess, M.K., Molden, S., Steffenach, H.A., Witter, M.P., Moser, M.B., Moser,  
756 E.I. (2002). Place cells and place recognition maintained by direct entorhinal-  
757 hippocampal circuitry. *Science* 296:2243-2246.
- 758 Cai, D.J. et al. (2016). A shared neural ensemble links distinct contextual memories encoded  
759 close in time. *Nature* 534:115-118. doi:10.1038/nature17955.
- 760 Canolty, R.T., Ganguly, K., Kennerley, S.W., Cadieu, C.F., Koepsell, K., Wallis, J.D.,  
761 Carmena, J.M. (2010). Oscillatory phase coupling coordinates anatomically dispersed  
762 functional cell assemblies. *Proc Natl Acad Sci U S A* 107:17356-17361.  
763 doi:10.1073/pnas.1008306107.
- 764 Chapuis, J., Garcia, S., Messaoudi, B., Thevenet, M., Ferreira, G., Gervais, R., Ravel, N.  
765 (2009). The way an odor is experienced during aversive conditioning determines the  
766 extent of the network recruited during retrieval: a multisite electrophysiological study  
767 in rats. *J Neurosci* 29:10287-10298. doi:10.1523/JNEUROSCI.0505-09.2009.
- 768 Davis, M. (1992). The role of the amygdala in fear and anxiety. *Annu Rev Neurosci* 15:353-  
769 375. doi:10.1146/annurev.ne.15.030192.002033.
- 770 de Araujo, I.E., Rolls, E.T., Kringelbach, M.L., McGlone, F., Phillips, N. (2003). Taste-  
771 olfactory convergence, and the representation of the pleasantness of flavour, in the  
772 human brain. *Eur J Neurosci* 18:2059-2068.
- 773 Denny, C.A., Kheirbek, M.A., Alba, E.L., Tanaka, K.F., Brachman, R.A., Laughman, K.B.,  
774 Tomm, N.K., Turi, G.F., Losonczy, A., Hen, R. (2014). Hippocampal memory traces  
775 are differentially modulated by experience, time, and adult neurogenesis. *Neuron*  
776 83:189-201. doi:10.1016/j.neuron.2014.05.018.
- 777 Donzis, E.J., Rennaker, R.L., Thompson, L.T. (2013). Fear conditioning alters neuron-specific  
778 hippocampal place field stability via the basolateral amygdala. *Brain Res* 1525:16-25.  
779 doi:10.1016/j.brainres.2013.06.015.
- 780 Epsztein, J., Brecht, M., Lee, A.K. (2011). Intracellular determinants of hippocampal CA1  
781 place and silent cell activity in a novel environment. *Neuron* 70:109-120.  
782 doi:10.1016/j.neuron.2011.03.006.
- 783 Ferguson, J.E., Jackson, J.C., Redish, A.D. (2011). An inside look at hippocampal silent cells.  
784 *Neuron* 70:3-5. doi:10.1016/j.neuron.2011.03.015.
- 785 Frank, L.M., Stanley, G.B., Brown, E.N. (2004). Hippocampal plasticity across multiple days  
786 of exposure to novel environments. *J Neurosci* 24:7681-7689.  
787 doi:10.1523/JNEUROSCI.1958-04.2004.

- 788 Fyhn, M., Hafting, T., Treves, A., Moser, M.B., Moser, E.I. (2007). Hippocampal remapping  
789 and grid realignment in entorhinal cortex. *Nature* 446:190–194.
- 790 Grosmark, A.D., Buzsaki, G. (2016). Diversity in neural firing dynamics supports both rigid  
791 and learned hippocampal sequences. *Science* 351:1440-1443.  
792 doi:10.1126/science.aad1935.
- 793 Harvey, C.D., Collman, F., Dombeck, D.A., Tank, D.W. (2009). Intracellular dynamics of  
794 hippocampal place cells during virtual navigation. *Nature* 461:941-946.  
795 doi:10.1038/nature08499.
- 796 Hok, V., Chah, E., Reilly, R.B., O'Mara, S.M. (2012). Hippocampal dynamics predict  
797 interindividual cognitive differences in rats. *J Neurosci* 32:3540-3551.  
798 doi:10.1523/JNEUROSCI.6449-11.2012.
- 799 Huff, M.L., Emmons, E.B., Narayanan, N.S., LaLumiere, R.T. (2016). Basolateral amygdala  
800 projections to ventral hippocampus modulate the consolidation of footshock, but not  
801 contextual, learning in rats. *Learn Mem* 23:51-60. doi:10.1101/lm.039909.115.
- 802 Huxter, J., Burgess, N., O'Keefe, J. (2003). Independent rate and temporal coding in  
803 hippocampal pyramidal cells. *Nature* 425:828-832. doi:10.1038/nature02058
- 804 nature02058 [pii].
- 805 Igarashi, K.M., Lu, L., Colgin, L.L., Moser, M.B., Moser, E.I. (2014). Coordination of  
806 entorhinal-hippocampal ensemble activity during associative learning. *Nature* 510:143-  
807 147. doi:10.1038/nature13162.
- 808 Ikegaya, Y., Saito, H., Abe, K. (1994). Attenuated hippocampal long-term potentiation in  
809 basolateral amygdala-lesioned rats. *Brain Res* 656:157-164.
- 810 Ikegaya, Y., Saito, H., Abe, K. (1995). Requirement of basolateral amygdala neuron activity  
811 for the induction of long-term potentiation in the dentate gyrus in vivo. *Brain Res*  
812 671:351-354.
- 813 Jeffery, K.J., O'Keefe, J.M. (1999). Learned interaction of visual and idiothetic cues in the  
814 control of place field orientation. *Exp Brain Res* 127:151-161.
- 815 Johansen, J.P., Hamanaka, H., Monfils, M.H., Behnia, R., Deisseroth, K., Blair, H.T., LeDoux,  
816 J.E. (2010). Optical activation of lateral amygdala pyramidal cells instructs associative  
817 fear learning. *Proc Natl Acad Sci U S A* 107:12692-12697.  
818 doi:10.1073/pnas.1002418107.
- 819 Johnson, A., Redish, A.D. (2007). Neural ensembles in CA3 transiently encode paths forward  
820 of the animal at a decision point. *J Neurosci* 27:12176-12189.
- 821 Johnson, A., Fenton, A.A., Kentros, C., Redish, A.D. (2009). Looking for cognition in the  
822 structure within the noise. *Trends Cogn Sci* 13:55-64. doi:S1364-6613(08)00261-1 [pii]
- 823 10.1016/j.tics.2008.11.005.
- 824 Karalis, N., Dejean, C., Chaudun, F., Khoder, S., Rozeske, R.R., Wurtz, H., Bagur, S.,  
825 Benchenane, K., Sirota, A., Courtin, J., Herry, C. (2016). 4-Hz oscillations synchronize  
826 prefrontal-amygdala circuits during fear behavior. *Nat Neurosci* 19:605-612.  
827 doi:10.1038/nn.4251.
- 828 Keinath, A.T., Wang, M.E., Wann, E.G., Yuan, R.K., Dudman, J.T., Muzzio, I.A. (2014).  
829 Precise spatial coding is preserved along the longitudinal hippocampal axis.  
830 *Hippocampus* 24:1533-1548. doi:10.1002/hipo.22333.
- 831 Kim, E.J., Kim, E.S., Park, M., Cho, J., Kim, J.J. (2012). Amygdalar stimulation produces  
832 alterations on firing properties of hippocampal place cells. *J Neurosci* 32:11424-11434.  
833 doi:10.1523/JNEUROSCI.1108-12.2012.
- 834 Kim, E.J., Park, M., Kong, M.S., Park, S.G., Cho, J., Kim, J.J. (2015). Alterations of  
835 hippocampal place cells in foraging rats facing a "predatory" threat. *Current biology :  
836 CB* 25:1362-1367. doi:10.1016/j.cub.2015.03.048.

- 837 Kim, J.J., Lee, H.J., Han, J.S., Packard, M.G. (2001). Amygdala is critical for stress-induced  
838 modulation of hippocampal long-term potentiation and learning. *J Neurosci* 21:5222-  
839 5228.
- 840 Kim, W.B., Cho, J.H. (2017). Synaptic Targeting of Double-Projecting Ventral CA1  
841 Hippocampal Neurons to the Medial Prefrontal Cortex and Basal Amygdala. *J Neurosci*  
842 37:4868-4882. doi:10.1523/JNEUROSCI.3579-16.2017.
- 843 Kitamura, T., Saitoh, Y., Takashima, N., Murayama, A., Niibori, Y., Ageta, H., Sekiguchi, M.,  
844 Sugiyama, H., Inokuchi, K. (2009). Adult neurogenesis modulates the hippocampus-  
845 dependent period of associative fear memory. *Cell* 139:814-827.  
846 doi:10.1016/j.cell.2009.10.020.
- 847 Klavir, O., Prigge, M., Sarel, A., Paz, R., Yizhar, O. (2017). Manipulating fear associations via  
848 optogenetic modulation of amygdala inputs to prefrontal cortex. *Nat Neurosci*.  
849 doi:10.1038/nn.4523.
- 850 Knierim, J.J. (2002). Dynamic interactions between local surface cues, distal landmarks, and  
851 intrinsic circuitry in hippocampal place cells. *J Neurosci* 22:6254-6264. doi:20026608.
- 852 Knierim, J.J. (2003). Hippocampus and memory. Can we have our place and fear it too? *Neuron*  
853 37:372-374.
- 854 Kobayakawa, K., Kobayakawa, R., Matsumoto, H., Oka, Y., Imai, T., Ikawa, M., Okabe, M.,  
855 Ikeda, T., Itohara, S., Kikusui, T., Mori, K., Sakano, H. (2007). Innate versus learned  
856 odour processing in the mouse olfactory bulb. *Nature* 450:503-508.  
857 doi:10.1038/nature06281.
- 858 Komorowski, R.W., Garcia, C.G., Wilson, A., Hattori, S., Howard, M.W., Eichenbaum, H.  
859 (2013). Ventral hippocampal neurons are shaped by experience to represent  
860 behaviorally relevant contexts. *J Neurosci* 33:8079-8087.  
861 doi:10.1523/JNEUROSCI.5458-12.2013.
- 862 Lachaux, J.P., Rodriguez, E., Martinerie, J., Varela, F.J. (1999). Measuring phase synchrony  
863 in brain signals. *Human brain mapping* 8:194-208.
- 864 LeDoux, J.E. (2000). Emotion circuits in the brain. *Annu Rev Neurosci* 23:155-184.
- 865 Lee, D., Lin, B.J., Lee, A.K. (2012). Hippocampal place fields emerge upon single-cell  
866 manipulation of excitability during behavior. *Science* 337:849-853. doi:337/6096/849  
867 [pii]  
868 10.1126/science.1221489.
- 869 Lee, I., Rao, G., Knierim, J.J. (2004). A double dissociation between hippocampal subfields:  
870 differential time course of CA3 and CA1 place cells for processing changed  
871 environments. *Neuron* 42:803-815.
- 872 Lee, I., Griffin, A.L., Zilli, E.A., Eichenbaum, H., Hasselmo, M.E. (2006). Gradual  
873 translocation of spatial correlates of neuronal firing in the hippocampus toward  
874 prospective reward locations. *Neuron* 51:639-650. doi:10.1016/j.neuron.2006.06.033.
- 875 Lepousez, G., Lledo, P.M. (2013). Odor discrimination requires proper olfactory fast  
876 oscillations in awake mice. *Neuron* 80:1010-1024. doi:10.1016/j.neuron.2013.07.025.
- 877 Leutgeb, S., Leutgeb, J.K., Barnes, C.A., Moser, E.I., McNaughton, B.L., Moser, M.B. (2005).  
878 Independent codes for spatial and episodic memory in hippocampal neuronal  
879 ensembles. *Science* 309:619-623. doi:10.1126/science.1114037.
- 880 Lowry, C.A., Kay, L.M. (2007). Chemical factors determine olfactory system beta oscillations  
881 in waking rats. *J Neurophysiol* 98:394-404. doi:10.1152/jn.00124.2007.
- 882 Mamad, O., McNamara, H.M., Reilly, R.B., Tsanov, M. (2015). Medial septum regulates the  
883 hippocampal spatial representation. *Frontiers in behavioral neuroscience* 9:166.  
884 doi:10.3389/fnbeh.2015.00166.



- 885 Mamad, O., Stumpp, L., McNamara, H.M., Ramakrishnan, C., Deisseroth, K., Reilly, R.B.,  
886 Tsanov, M. (2017). Place field assembly distribution encodes preferred locations. *PLoS*  
887 *Biol* 15:e2002365. doi:10.1371/journal.pbio.2002365.
- 888 Maren, S., Holt, W.G. (2004). Hippocampus and Pavlovian fear conditioning in rats: muscimol  
889 infusions into the ventral, but not dorsal, hippocampus impair the acquisition of  
890 conditional freezing to an auditory conditional stimulus. *Behav Neurosci* 118:97-110.  
891 doi:10.1037/0735-7044.118.1.97.
- 892 Martin, C., Beshel, J., Kay, L.M. (2007). An olfacto-hippocampal network is dynamically  
893 involved in odor-discrimination learning. *J Neurophysiol* 98:2196-2205.  
894 doi:00524.2007 [pii]  
10.1152/jn.00524.2007.
- 895  
896 McNaughton, B.L., Barnes, C.A., O'Keefe, J. (1983). The contributions of position, direction,  
897 and velocity to single unit activity in the hippocampus of freely-moving rats. *Exp Brain*  
898 *Res* 52:41-49.
- 899 Mehta, M.R., Barnes, C.A., McNaughton, B.L. (1997). Experience-dependent, asymmetric  
900 expansion of hippocampal place fields. *Proc Natl Acad Sci USA* 94:8918-8921.
- 901 Moita, M.A., Rosis, S., Zhou, Y., LeDoux, J.E., Blair, H.T. (2004). Putting fear in its place:  
902 remapping of hippocampal place cells during fear conditioning. *J Neurosci* 24:7015-  
903 7023. doi:10.1523/JNEUROSCI.5492-03.2004.
- 904 Moriceau, S., Wilson, D.A., Levine, S., Sullivan, R.M. (2006). Dual circuitry for odor-shock  
905 conditioning during infancy: corticosterone switches between fear and attraction via  
906 amygdala. *J Neurosci* 26:6737-6748. doi:10.1523/JNEUROSCI.0499-06.2006.
- 907 Myers, E.A., Rinaman, L. (2005). Trimethylthiazoline supports conditioned flavor avoidance  
908 and activates viscerosensory, hypothalamic, and limbic circuits in rats. *Am J Physiol*  
909 *Regul Integr Comp Physiol* 288:R1716-1726. doi:10.1152/ajpregu.00479.2004.
- 910 Nadel, L., Moscovitch, M. (1997). Memory consolidation, retrograde amnesia and the  
911 hippocampal complex. *Curr Opin Neurobiol* 7:217-227.
- 912 Navratilova, Z., Hoang, L.T., Schwindel, C.D., Tatsuno, M., McNaughton, B.L. (2012).  
913 Experience-dependent firing rate remapping generates directional selectivity in  
914 hippocampal place cells. *Front Neural Circuits* 6:6. doi:10.3389/fncir.2012.00006.
- 915 O'Keefe, J., Nadel, L. (1978). Hippocampus as a Cognitive Map. (*Oxford: Clarindon*).
- 916 Orsini, C.A., Kim, J.H., Knapska, E., Maren, S. (2011). Hippocampal and prefrontal  
917 projections to the basal amygdala mediate contextual regulation of fear after extinction.  
918 *J Neurosci* 31:17269-17277. doi:10.1523/JNEUROSCI.4095-11.2011.
- 919 Phelps, E.A., LeDoux, J.E. (2005). Contributions of the amygdala to emotion processing: from  
920 animal models to human behavior. *Neuron* 48:175-187.  
921 doi:10.1016/j.neuron.2005.09.025.
- 922 Pikkariainen, M., Ronkko, S., Savander, V., Insausti, R., Pitkanen, A. (1999). Projections from  
923 the lateral, basal, and accessory basal nuclei of the amygdala to the hippocampal  
924 formation in rat. *J Comp Neurol* 403:229-260.
- 925 Ramirez, S., Liu, X., Lin, P.A., Suh, J., Pignatelli, M., Redondo, R.L., Ryan, T.J., Tonegawa,  
926 S. (2013). Creating a false memory in the hippocampus. *Science* 341:387-391.  
927 doi:10.1126/science.1239073.
- 928 Ranck, J.B., Jr. (1973). Studies on single neurons in dorsal hippocampal formation and septum  
929 in unrestrained rats. I. Behavioral correlates and firing repertoires. *Exp Neurol* 41:461-  
930 531.
- 931 Rashid, A.J., Yan, C., Mercaldo, V., Hsiang, H.L., Park, S., Cole, C.J., De Cristofaro, A., Yu,  
932 J., Ramakrishnan, C., Lee, S.Y., Deisseroth, K., Frankland, P.W., Josselyn, S.A. (2016).

- 933 Competition between engrams influences fear memory formation and recall. *Science*  
934 353:383-387. doi:10.1126/science.aaf0594.
- 935 Richter-Levin, G., Akirav, I. (2000). Amygdala-hippocampus dynamic interaction in relation  
936 to memory. *Mol Neurobiol* 22:11-20. doi:10.1385/MN:22:1-3:011.
- 937 Rickgauer, J.P., Deisseroth, K., Tank, D.W. (2014). Simultaneous cellular-resolution optical  
938 perturbation and imaging of place cell firing fields. *Nat Neurosci* 17:1816-1824.  
939 doi:10.1038/nn.3866.
- 940 Ryan, T.J., Roy, D.S., Pignatelli, M., Arons, A., Tonegawa, S. (2015). Memory. Engram cells  
941 retain memory under retrograde amnesia. *Science* 348:1007-1013.  
942 doi:10.1126/science.aaa5542.
- 943 Sadrian, B., Wilson, D.A. (2015). Optogenetic Stimulation of Lateral Amygdala Input to  
944 Posterior Piriform Cortex Modulates Single-Unit and Ensemble Odor Processing. *Front*  
945 *Neural Circuits* 9:81. doi:10.3389/fncir.2015.00081.
- 946 Sotres-Bayon, F., Sierra-Mercado, D., Pardilla-Delgado, E., Quirk, G.J. (2012). Gating of fear  
947 in prelimbic cortex by hippocampal and amygdala inputs. *Neuron* 76:804-812.  
948 doi:10.1016/j.neuron.2012.09.028.
- 949 Steffenach, H.A., Sloviter, R.S., Moser, E.I., Moser, M.B. (2002). Impaired retention of spatial  
950 memory after transection of longitudinally oriented axons of hippocampal CA3  
951 pyramidal cells. *Proc Natl Acad Sci U S A* 99:3194-3198. doi:10.1073/pnas.042700999.
- 952 Taube, J.S. (1995). Head direction cells recorded in the anterior thalamic nuclei of freely  
953 moving rats. *J Neurosci* 15:70-86.
- 954 Tayler, K.K., Tanaka, K.Z., Reijmers, L.G., Wiltgen, B.J. (2013). Reactivation of neural  
955 ensembles during the retrieval of recent and remote memory. *Current biology : CB*  
956 23:99-106. doi:10.1016/j.cub.2012.11.019.
- 957 Tonegawa, S., Liu, X., Ramirez, S., Redondo, R. (2015). Memory Engram Cells Have Come  
958 of Age. *Neuron* 87:918-931. doi:10.1016/j.neuron.2015.08.002.
- 959 Vouimba, R.M., Richter-Levin, G. (2005). Physiological dissociation in hippocampal  
960 subregions in response to amygdala stimulation. *Cereb Cortex* 15:1815-1821.  
961 doi:10.1093/cercor/bhi058.
- 962 Wallace, K.J., Rosen, J.B. (2001). Neurotoxic lesions of the lateral nucleus of the amygdala  
963 decrease conditioned fear but not unconditioned fear of a predator odor: comparison  
964 with electrolytic lesions. *J Neurosci* 21:3619-3627.
- 965 Wang, M.E., Yuan, R.K., Keinath, A.T., Ramos Alvarez, M.M., Muzzio, I.A. (2015).  
966 Extinction of Learned Fear Induces Hippocampal Place Cell Remapping. *J Neurosci*  
967 35:9122-9136. doi:10.1523/JNEUROSCI.4477-14.2015.
- 968 Wang, M.E., Wann, E.G., Yuan, R.K., Ramos Alvarez, M.M., Stead, S.M., Muzzio, I.A.  
969 (2012). Long-term stabilization of place cell remapping produced by a fearful  
970 experience. *J Neurosci* 32:15802-15814. doi:10.1523/JNEUROSCI.0480-12.2012.
- 971 Wilson, M.A., McNaughton, B.L. (1993). Dynamics of the hippocampal ensemble code for  
972 space. *Science* 261:1055-1058.
- 973 Witten, I.B., Steinberg, E.E., Lee, S.Y., Davidson, T.J., Zalocusky, K.A., Brodsky, M., Yizhar,  
974 O., Cho, S.L., Gong, S., Ramakrishnan, C., Stuber, G.D., Tye, K.M., Janak, P.H.,  
975 Deisseroth, K. (2011). Recombinase-driver rat lines: tools, techniques, and optogenetic  
976 application to dopamine-mediated reinforcement. *Neuron* 72:721-733.  
977 doi:10.1016/j.neuron.2011.10.028.
- 978 Wu, C.T., Haggerty, D., Kemere, C., Ji, D. (2017). Hippocampal awake replay in fear memory  
979 retrieval. *Nat Neurosci* 20:571-580. doi:10.1038/nn.4507.

980

981

982 **Figure Legends**

983 **Figure 1. Hippocampal beta amplitude increase during odor-triggered place avoidance.**

984 **A**, Behavioral set-up of rectangular-shaped linear track. Locations of the TMT are marked with  
985 red in the north and east arms of the track. The black dashed line indicates the TMT arms, while  
986 grey dashed line marks the non-TMT arms. To match the TMT protocol with the subsequent  
987 ChR2 photostimulation protocol we applied the TMT scent papers to all locations across the  
988 TMT arms. **B**, Navigation path of sample animal during the TMT session. Note the place  
989 avoidance of the TMT arms. The grey dashed line marks the non-TMT zone. **C**, Number of  
990 passes (left graph) and duration in seconds (right graph) counted in the TMT arms vs non-TMT  
991 arms during the pre-TMT-, TMT- and post-TMT sessions,  $***P < 0.001$ . Error bars, mean  $\pm$   
992 s.e.m. **D**, Number of passes through the TMT- and non-TMT arms for the first 60 seconds of  
993 the post-TMT session.  $**P < 0.01$ . **E**, Representative band pass filtered (15 – 40Hz) local field  
994 potential (LFP) recorded during the passes in the TMT arms (top panel) and in the non-TMT  
995 arms (bottom panel). Time 0 indicates the onset of the path trajectory starting from pellet  
996 delivery location. **F**, Representative averaged band pass filtered (15 – 40Hz) color-coded  
997 power spectrogram of all passes in the TMT arms (top panel) and in the non-TMT arms (bottom  
998 panel). Time 0 indicates the onset of the path trajectory starting from pellet delivery location.  
999 The averaged power-spectrogram includes the variability of passes duration and speed during  
1000 the navigation across the arms. **G**, Spatial dissociation of odor perception for in TMT arms (top  
1001 panel) and in the non-TMT arms (bottom panel). The arm with TMT scent paper (marked with  
1002 red) was named TMT arm 1. The adjacent arm, part of the same food-navigation loop, was  
1003 TMT arm 2. The opposite of the TMT arm 1 was named non-TMT arm 1, while the opposite  
1004 of the TMT arm 2 was non-TMT arm 2. The scent was detected by the animal at different  
1005 locations during the navigation passes across the TMT arms. Black arrows indicate the possible  
1006 path trajectories of the animals. **H**, Mean beta amplitude and **I**, mean beta frequency measured



1007 during different whole body speed ranges of 0 – 40 cm/s in bins of 5 cm/s. **J**, Beta amplitude  
1008 for TMT arm 1 and **K** TMT arm 2 (right) as percent of the pre-TMT session values for the  
1009 entire track. \*\*\* $P < 0.001$ , \*\* $P < 0.01$ , \* $P < 0.05$  Error bars, mean  $\pm$  s.e.m. **L**, Beta amplitude  
1010 for non-TMT arm 1 and **M**, non-TMT arm 2 as percent of the pre-TMT session values for the  
1011 entire track. The amplitude values are presented as a function of the animal's whole body speed,  
1012 where beta amplitude is evaluated for speed range of 0 – 40 cm/s in bins of 5 cm/s. Error bars,  
1013 mean  $\pm$  s.e.m. **N**, Beta frequency for TMT arm 1 and **O**, TMT arm 2 for speed range of 0 – 40  
1014 cm/s in bins of 5 cm/s. Error bars, mean  $\pm$  s.e.m.

1015

1016 **Figure 2. Individual place field reconfiguration after exposure to TMT.** **A**, Center of mass  
1017 shift ( $\Delta$ COM) of place cells recorded from baseline group of animals exposed to familiar odor  
1018 (10% ethanol) and group of rats exposed to innately aversive odor (10% TMT). \*\*\* $P < 0.001$ .  
1019 Error bars, mean  $\pm$  s.e.m. **B**, Correlation between the average  $\Delta$ COM for each rat and the ratio  
1020 of the TMT- over the non-TMT arms passes for the first 60 seconds of the post-TMT session.  
1021 **C**, Left: Color-coded 3D-spatial map of a sample place cell with place field located outside the  
1022 TMT arms (the TMT arms are marked with red line), recorded during pre-TMT session. X-  
1023 and Y-axes represent the coordinates of the recording arena, while Z-axis represents the firing  
1024 rate of the recorded neuron. Blue colors represent low-, while red colors represent high firing  
1025 rate. Right: Color-coded 3D-spatial map of a sample place cell with place field located outside  
1026 the TMT arms (the TMT arms are marked with red line), recorded during TMT session. The  
1027 inset below shows with red line the position of the TMT arms (circles indicate the pellet  
1028 delivery corners). The spiking TMT ratio represents the mean (peak) firing rate of the pre-TMT  
1029 session over the TMT session. The inset below shows the radial representation of COMa. The  
1030 straight purple line starting from the southeast corner of the track and it indicates the COM  
1031 position in respect to the main axis of the track positioned between the food zones (marked

1032 with black dots, in the SE and NW corners). Value of  $45^\circ$  indicates COM evenly distributed  
1033 across the main axis of the track,  $0^\circ$  indicates COM fully distributed within the SW section and  
1034  $90^\circ$  - in the NE section of the track. **D**, Six sample place cells recorded from animal of the NE  
1035 group during pre-TMT session (upper panels), TMT session (middle panels) and post-TMT  
1036 session (lower panels). The straight purple line denotes the center of mass angle (COMa) for  
1037 each cell between SW at  $0^\circ$  and NE at  $90^\circ$ . Note that some of the place cells exhibited higher  
1038 firing rate in the TMT arms during the TMT sessions (panels positioned on the right half)  
1039 compared to place cells with little or no spiking (panels positioned on the left half). **E**, Six  
1040 sample place cells recorded from animal of the SW group during pre-TMT session (upper  
1041 panels), TMT session (middle panels) and post-TMT session (lower panels). **F**, Correlation  
1042 between  $\Delta$ COMa and TMT spiking ratio based on the mean firing rate of the place cells' spikes  
1043 in the TMT arms. **G**, Correlation between  $\Delta$ COMa and non-TMT spiking ratio based on the  
1044 mean firing rate of the place cells' spikes in the non-TMT zone. **H**, Correlation between  
1045  $\Delta$ COMa and the spiking ratio based on the peak firing rate for the spikes in the TMT arms. **I**,  
1046 Correlation between  $\Delta$ COMa and the spiking ratio based on the peak firing rate for the spikes  
1047 in the non-TMT zone.

1048

1049 **Figure 3. Place field stability in control conditions.** **A**, Schematic representation of the  
1050 application of a familiar scent, ethanol (marked with red) in the SW arms of rectangular-shaped  
1051 linear track for the control group of animals. **B**, Number of passes (left panel) and duration in  
1052 seconds (right panel) counted in the ethanol arms (left) and non-ethanol arms (right) for the  
1053 control group of rats, before (blue) and during (red) the odor exposure. Error bars, mean  $\pm$   
1054 s.e.m. **C**, Three place fields from sample animal with fields located outside the ethanol arms  
1055 during pre- (top), ethanol (middle) and post-ethanol sessions (bottom). For each session the  
1056 upper panels show the animal trajectory with spikes, marked with colored dots, while the lower

1057 panels show color-coded firing rate. **D**, Three place fields from same animal with fields located  
1058 inside the ethanol arms during pre- (top), ethanol (middle) and post-ethanol sessions (bottom).  
1059 For each session the upper panels show the animal trajectory with spikes, marked with colored  
1060 dots, while the lower panels show color-coded firing rate. **E**, Waveforms of the place cells  
1061 shown in C, and **F**, waveforms of the cells shown in D, respectively. The solid line shows the  
1062 average waveform shape; the dashed lines show the 1 SD confidence intervals. **G**, Correlation  
1063 between  $\Delta\text{COMa}$  and the spiking ratio based on the mean firing rate of the place cells' spikes  
1064 in the ethanol arms. **H**, Correlation between  $\Delta\text{COMa}$  and the spiking ratio based on the mean  
1065 firing rate of the place cells' spikes in the non-ethanol zone. **I**, Correlation between  $\Delta\text{COMa}$   
1066 and the spiking ratio based on the peak firing rate for the spikes in the ethanol arms. **J**,  
1067 Correlation between  $\Delta\text{COMa}$  and the spiking ratio based on the peak firing rate for the spikes  
1068 in the non-ethanol zone.

1069

1070 **Figure 4. Increased extra-field place cell spiking during TMT exposure predicts spatial**  
1071 **field reconfiguration.** **A**, Four place fields from sample animal with fields located in the TMT  
1072 arms during pre-TMT sessions (top), TMT (middle) and post-TMT sessions (bottom). For each  
1073 session the upper panels show the animal trajectory with spikes, marked with colored dots,  
1074 while the lower panels show color-coded firing rate. **B**, Four place fields from the same animal  
1075 with fields outside the TMT arms. **C**, Waveforms of the place cells from the pre-TMT, TMT  
1076 and post-TMT sessions shown in A, and **D**, waveforms of the cells shown B, respectively. The  
1077 solid line shows the average waveform shape; the dashed lines show the 1 SD confidence  
1078 intervals. **E**, Correlation between  $\Delta\text{COMa}$  and TMT mean spiking ratio for the place cells  
1079 located outside the TMT arms (extra-field spikes), Supplementary Table 1. **F**, Correlation  
1080 between  $\Delta\text{COMa}$  and TMT mean spiking ratio for the place cells located inside the TMT arms  
1081 (intra-field spikes), Supplementary Table 2. **G**, Correlation between  $\Delta\text{COMa}$  and non-TMT

1082 mean spiking ratio for the place cells located inside the non-TMT arms (intra-field spikes),  
1083 Supplementary Table 3. **H**, Correlation between  $\Delta\text{COMa}$  and non-TMT mean spiking ratio for  
1084 the place cells located outside the non-TMT zone (extra-field spikes), Supplementary Table 4.  
1085 **I**, Correlation between  $\Delta\text{COMa}$  and TMT peak spiking ratio for the place cells located outside  
1086 the TMT arms (extra-field spikes), Supplementary Table 1. **J**, Correlation between  $\Delta\text{COMa}$   
1087 and TMT peak spiking ratio for the place cells located inside the TMT arms (intra-field spikes),  
1088 Supplementary Table 2. **K**, Correlation between  $\Delta\text{COMa}$  and non-TMT peak spiking ratio for  
1089 the place cells located inside the non-TMT zone (intra-field spikes), Supplementary Table 3.  
1090 **L**, Correlation between  $\Delta\text{COMa}$  and non-TMT peak spiking ratio the place cells located outside  
1091 the non-TMT zone (extra-field spikes), Supplementary Table 4.

1092

1093 **Figure 5. Field but not rate remapping after aversive experience.** **A**, Color-coded linearized  
1094 map showing location of CA1 place fields before (left panel) and after (right panel) exposure  
1095 to ethanol for clockwise, Supplementary Table 5 and **B**, counter-clockwise direction of  
1096 movement, Supplementary Table 6. Each line shows activity of one place cell (86 datasets in  
1097 total from 63 place cells). The horizontal grey bar indicates the ethanol zone during the  
1098 exposure session, while black vertical arrows indicate the location of the food delivery. **C**,  
1099 Linearized map before (left panel) and after (right panel) exposure to TMT in the SW section  
1100 of the track for clockwise, Supplementary Table 7 and **D**, counter-clockwise direction of  
1101 movement, Supplementary Table 8. Each line shows activity of one place cell (98 datasets in  
1102 total from 66 place cells). The horizontal red bar indicates the TMT zone during the exposure  
1103 session, while black vertical arrows indicate the location of the food delivery. **E**, Linearized  
1104 maps before (left panel) and after (right panel) exposure to TMT in the NE section of the track  
1105 for clockwise, Supplementary Table 9 and **F**, counter-clockwise direction of movement,  
1106 Supplementary Table 10. Each line shows activity of one place cell (68 datasets in total from

1107 40 place cells). **G**, Comparison of the place field mean spiking before and after exposure to  
1108 TMT. The pre/post normalised count represents decrease (positive) and increase (negative  
1109 values) for the mean firing rate of clockwise fields for ethanol, TMT-NE- and TMT-SW  
1110 groups. Error bars, mean  $\pm$  s.e.m. **H**, Comparison of the place field peak spiking before and  
1111 after exposure to TMT of clockwise fields for the same groups. Error bars, mean  $\pm$  s.e.m. **I**,  
1112 Center of mass shift ( $\Delta$ COM) after exposure to TMT of clockwise fields for ethanol, TMT-  
1113 NE- and TMT-SW groups. Error bars, mean  $\pm$  s.e.m. \*\*\* $P < 0.001$ . **J**, Comparison of the place  
1114 field mean spiking before and after exposure to TMT for counter-clockwise fields. Error bars,  
1115 mean  $\pm$  s.e.m. **K**, Comparison of the place field peak spiking before and after exposure to TMT  
1116 for counter-clockwise fields. Error bars, mean  $\pm$  s.e.m. **L**,  $\Delta$ COM after exposure to TMT for  
1117 counter-clockwise fields. Error bars, mean  $\pm$  s.e.m. \*\*\* $P < 0.001$ .

1118

1119 **Figure 6. Photostimulation of basolateral complex of amygdala evokes spatial aversion.**

1120 **A**, Atlas schematic shows the injection site of AAV-CaMKII $\alpha$ -hChR2-YFP and the optic fiber  
1121 location in the basolateral complex of amygdala (BA – basal nucleus, LA – lateral nucleus of  
1122 amygdala, CA – central nucleus of amygdala). The confocal images on the right show  
1123 increasing levels of magnification of the YFP-expressing neurons (green) in BLA is histology  
1124 with DAPI staining (blue). **B**, Raster plot from 40 repetitions and **C**, averaged firing frequency  
1125 of optically evoked time-locked excitation of a BLA cell. Time 0 indicates the delivery of the  
1126 first train of the stimulation protocol. **D**, Experimental setup: light delivery in the south and  
1127 west ChR2 arms, marked with dashed blue line. **E**, Number of passes (left panel) and duration  
1128 in seconds (right panel) counted in the ChR2 arms vs non-ChR2 arms during the pre-ChR2,  
1129 ChR2- and post-ChR2 sessions. \*\* $P < 0.01$ . Error bars, mean  $\pm$  s.e.m. **F**, Number of passes  
1130 through the ChR2- and non-ChR2 arms for the first 60 seconds of the post-ChR2 session. **G**,  
1131 Event related potentials (ERPs) recorded in dorsal CA1 from of 32 electrodes in a sample

1132 animal. Time 0 indicates the delivery of the onset of the BLA optogenetic stimulation. **H**,  
1133 Color-coded power spectrogram of hippocampal low-frequency oscillations (4 – 15Hz) during  
1134 the photostimulation protocol. **I**, Representative phase-locking value after BLA  
1135 photostimulation for the observed data (blue) and for control shuffled data (green). **J**,  
1136 Comparison of the place cell's spiking before and after the photostimulation onset for intra-  
1137 and extra-field spikes. The pre/post normalised count represents decrease (positive) and  
1138 increase (negative values) for the first 500- (left), 250- (middle) and 100ms (right) after the  
1139 optogenetic protocol onset for the intra-field (light blue) and extra-field spikes (blue).  $**P <$   
1140  $0.01$ . Error bars, mean  $\pm$  s.e.m. **K**,  $\Delta$ COMa for place fields located outside the ChR2 arms  
1141 (extra-field) and for place cells located inside the ChR2 arms (intra-field) from ChR2  
1142 recordings (blue) and control YFP recordings (green).  $*P < 0.05$ . Error bars, mean  $\pm$  s.e.m.

1143

1144 **Figure 7. Photostimulation of control YFP-expressing BLA neurons.** **A**, YFP expression  
1145 (left), anti-calcium/calmodulin-dependent protein kinase II alfa (anti-CamKII $\alpha$ ) staining  
1146 (middle) and their overlay in BLA (right). The green asterisks show two YFP-expressing  
1147 neurons, while the red asterisks show three CamKII $\alpha$ -marked neurons. The confocal image on  
1148 the far right shows YFP-expressing neurons (green) in BLA is histology with DAPI staining  
1149 (blue). Raster plot from 40 repetitions **B**, and **C**, firing frequency of time-locked  
1150 photostimulation of a BLA cell in control animals injected with AAV-YFP viral construct.  
1151 Time 0 indicates the delivery of the first train of the stimulation protocol. **D**, Experimental  
1152 setup: light delivery in the south and west arms of the rectangular-shaped linear track (YFP  
1153 arms, marked with dashed green line). No photostimulation was applied in the non-ChR2 zone  
1154 (marked with dashed gray line). **E**, Number of passes counted from control animals injected  
1155 with AVV-YFP construct in the YFP arms vs non-YFP zone during the pre-YFP, YFP-, and  
1156 post-YFP sessions. Error bars, mean  $\pm$  s.e.m. **F**, Event related potentials (ERPs) recorded in

1157 dorsal CA1 from of 32 electrodes in a sample control animal. Time 0 indicates the delivery of  
1158 the onset of the BLA YFP photostimulation. **G**, Color-coded power spectrogram of  
1159 hippocampal low-frequency oscillations (4 – 15Hz) during the YFP photostimulation. **H**,  
1160 Representative phase-locking value after BLA YFP photostimulation for the observed data  
1161 (blue) and for control shuffled data (green).

1162

1163 **Figure 8. Control place fields during BLA photostimulation.** **A**, Four place fields from two  
1164 sample animals with fields located outside the YFP arms during pre-YFP sessions (top), YFP  
1165 (middle) and post- YFP sessions (bottom). For each session the upper panels show color-coded  
1166 firing rate, while the lower panels show the animal trajectory with spikes, marked with colored  
1167 dots. **B**, Four place fields from the same two animals with fields located inside the YFP arms  
1168 during pre-YFP sessions (top), YFP (middle) and post-YFP sessions (bottom). **C**, Waveforms  
1169 of the place cells shown in **A**, and **D**, waveforms of the cells shown **B**, respectively. The solid  
1170 line shows the average waveform shape; the dashed lines show the 1 SD confidence intervals.

1171

1172 **Figure 9. Place fields of cells with high extra-field spiking during BLA photostimulation.**  
1173 **A**, Eight place cells from four rats, with fields located outside the ChR2 arms, with expressed  
1174 extra-field spiking activity during the light delivery. Top panels: pre-ChR2 session, middle  
1175 panels: ChR2 session, and bottom panels: post-ChR2 session. For each session the upper panels  
1176 show color-coded firing rate, while the lower panels show the animal trajectory with spikes,  
1177 marked with colored dots. **B**, Waveforms of the place cells above, recorded from the pre-ChR2  
1178 (top row), ChR2 (middle row) and post-ChR2 session (bottom row). The solid line shows the  
1179 average waveform shape; the dashed lines show the 1 SD confidence intervals.

1180



1181 **Figure 10. Place fields of cells with low extra-field spiking during BLA photostimulation.**

1182 **A**, Eight place cells from the same four rats, with fields located outside the ChR2 arms, with  
1183 little or no extra-field spiking activity during the light delivery. For each session the upper  
1184 panels show color-coded firing rate, while the lower panels show the animal trajectory with  
1185 spikes, marked with colored dots. **B**, Waveforms of the place cells above, recorded from the  
1186 pre-ChR2 (top row), ChR2 (middle row) and post-ChR2 session (bottom row). The solid line  
1187 shows the average waveform shape; the dashed lines show the 1 SD confidence intervals.

1188

1189 **Figure 11. BLA-triggered hippocampal spiking increase correlates to the place field**

1190 **center of mass shift.** **A**, Eight place cells from four rats, with fields located inside the ChR2  
1191 arms, with intra-field spiking during the light delivery. Top panels: pre-ChR2 session, middle  
1192 panels: ChR2 session, and bottom panels: post-ChR2 session. For each session the upper panels  
1193 show color-coded firing rate, while the lower panels show the animal trajectory with spikes,  
1194 marked with colored dots. **B**, Waveforms of the place cells above, recorded from the pre-ChR2  
1195 (top row), ChR2 (middle row) and post-ChR2 session (bottom row). The solid line shows the  
1196 average waveform shape; the dashed lines show the 1 SD confidence intervals. **C**, Correlation  
1197 between  $\Delta\text{COMa}$  and ChR2 mean spiking ratio for the extra-field spikes of the place cells  
1198 located outside the ChR2 arms, Supplementary Table 11. **D**, Correlation between  $\Delta\text{COMa}$  and  
1199 ChR2 mean spiking ratio for the intra-field spikes of the place cells located inside the ChR2  
1200 arms, Supplementary Table 12. **E**, Correlation between  $\Delta\text{COMa}$  and non-ChR2 mean spiking  
1201 ratio for the intra-field spikes of the place cells located inside the non-ChR2 zone,  
1202 Supplementary Table 13. **F**, Correlation between  $\Delta\text{COMa}$  and non-ChR2 mean spiking ratio  
1203 for the extra-field spikes of the place cells located outside the non-ChR2 zone, Supplementary  
1204 Table 14. **G**, Correlation between  $\Delta\text{COMa}$  and ChR2 peak spiking ratio for the extra-field  
1205 spikes of the place cells located outside the ChR2 arms, Supplementary Table 11. **H**,

1206 Correlation between  $\Delta\text{COMa}$  and ChR2 peak spiking ratio for the intra-field spikes of the place  
1207 cells located inside the ChR2 arms, Supplementary Table 12. *I*, Correlation between  $\Delta\text{COMa}$   
1208 and non-ChR2 peak spiking ratio for the intra-field spikes of the place cells located inside the  
1209 non-ChR2 zone, Supplementary Table 13. *J*, Correlation between  $\Delta\text{COMa}$  and non-ChR2 peak  
1210 spiking ratio for the extra-field spikes of the place cells located outside the non-ChR2 zone,  
1211 Supplementary Table 14.

1212

1213 **Figure 12. Unidirectional field remapping after BLA photostimulation.** *A*, Color-coded  
1214 linearized map showing location of CA1 place fields before (left panel) and after (right panel)  
1215 light delivery session to the YFP group of rats for clockwise, Supplementary Table 15 and *B*,  
1216 counter-clockwise direction of movement, Supplementary Table 16. Each line shows activity  
1217 of one place cell (84 datasets in total from 69 place cells). The horizontal green bar indicates  
1218 the light delivery YFP zone during the exposure session, while black vertical arrows indicate  
1219 the location of the food delivery. *C*, Color-coded linearized map showing location of CA1 place  
1220 fields before (left panel) and after (right panel) light delivery session to the ChR2 group of rats  
1221 for clockwise, Supplementary Table 17 and *D*, counter-clockwise direction of movement,  
1222 Supplementary Table 18. Each line shows activity of one place cell (154 datasets in total from  
1223 79 place cells). The horizontal blue bar indicates the light delivery ChR2 zone during the  
1224 exposure session, while black vertical arrows indicate the location of the food delivery. *E*,  
1225 Comparison of the place field mean spiking before and after BLA photostimulation. The  
1226 pre/post normalised count represents decrease (positive) and increase (negative values) for the  
1227 mean firing rate of clockwise fields for YFP and ChR2 groups. Error bars, mean  $\pm$  s.e.m. *F*,  
1228 Comparison of the place field peak spiking before and after BLA photostimulation of clockwise  
1229 fields for the same groups. Error bars, mean  $\pm$  s.e.m. *G*, Center of mass shift ( $\Delta\text{COM}$ ) after  
1230 BLA photostimulation of clockwise fields for YFP and ChR2 groups. Error bars, mean  $\pm$  s.e.m.

1231 \*\*\* $P < 0.001$ . **H**, Comparison of the place field mean spiking before and after BLA  
 1232 photostimulation for counter-clockwise fields. Error bars, mean  $\pm$  s.e.m. **I**, Comparison of the  
 1233 place field peak spiking before and after BLA photostimulation for counter-clockwise fields.  
 1234 Error bars, mean  $\pm$  s.e.m. **J**, Center of mass shift ( $\Delta$ COM) after BLA photostimulation for  
 1235 counter-clockwise fields. Error bars, mean  $\pm$  s.e.m. \*\*\* $P < 0.001$ .

1236 **Tables**

1237 **Table 1: Path sampling from recordings with aversive experimental design.** Number of  
 1238 passes and dwell time (duration in seconds) measured in the south and west (SW), and north  
 1239 and east (NE) arms for TMT- and ChR2- groups of animals during the pre-TMT(ChR2),  
 1240 TMT(ChR2)- and post-TMT(ChR2) recording sessions. The rats exposed to TMT include  
 1241 TMT-NE and TMT-SW-groups.

| TMT-NE<br>Rat #  | Pre-TMT session  |    |                |       | TMT-NE session  |     |                |       | Post-TMT session  |    |                |       |
|------------------|------------------|----|----------------|-------|-----------------|-----|----------------|-------|-------------------|----|----------------|-------|
|                  | Passes           |    | Duration (sec) |       | Passes          |     | Duration (sec) |       | Passes            |    | Duration (sec) |       |
|                  | SW               | NE | SW             | NE    | SW              | NE  | SW             | NE    | SW                | NE | SW             | NE    |
| Rat 1            | 38               | 42 | 102.2          | 112.7 | 50              | 0   | 150.2          | 0     | 42                | 31 | 134.6          | 107.5 |
| Rat 2            | 33               | 41 | 156.9          | 181.4 | 91              | 9   | 266.4          | 65.4  | 60                | 51 | 187.5          | 160.7 |
| Rat 3            | 31               | 48 | 122.8          | 218.8 | 62              | 0   | 229.4          | 0     | 74                | 24 | 241.0          | 91.92 |
| Rat 4            | 53               | 59 | 153.1          | 183.1 | 70              | 0   | 272.2          | 0     | 47                | 43 | 189.5          | 154.9 |
| Rat 5            | 48               | 54 | 150.4          | 194.3 | 78              | 0   | 260.7          | 0     | 75                | 37 | 233.2          | 116.5 |
| Rat 6            | 64               | 80 | 163.1          | 210.9 | 101             | 0   | 308.8          | 0     | 72                | 60 | 194.2          | 189.9 |
| TMT-SW<br>Rat #  | Pre-TMT session  |    |                |       | TMT-SW session  |     |                |       | Post-TMT session  |    |                |       |
|                  | Passes           |    | Duration (sec) |       | Passes          |     | Duration (sec) |       | Passes            |    | Duration (sec) |       |
|                  | SW               | NE | SW             | NE    | SW              | NE  | SW             | NE    | SW                | NE | SW             | NE    |
| Rat 7            | 31               | 50 | 105.8          | 157.9 | 15              | 47  | 50.9           | 187.9 | 38                | 42 | 112.0          | 153.0 |
| Rat 8            | 56               | 59 | 170.8          | 152.5 | 0               | 95  | 0              | 350.3 | 41                | 63 | 136.5          | 166.9 |
| Rat 9            | 40               | 39 | 160.7          | 107.1 | 0               | 106 | 0              | 258.7 | 49                | 87 | 152.6          | 159.4 |
| Rat 10           | 61               | 51 | 167.7          | 132.7 | 16              | 46  | 30.2           | 79.2  | 44                | 73 | 154.2          | 180.6 |
| Rat 11           | 60               | 52 | 175.5          | 138.4 | 24              | 82  | 52.7           | 248.3 | 42                | 65 | 163.2          | 188.4 |
| Rat 12           | 59               | 80 | 186.1          | 198.6 | 5               | 130 | 17.1           | 346.1 | 55                | 72 | 190.9          | 224   |
| ChR2-SW<br>Rat # | Pre-ChR2 session |    |                |       | ChR2-SW session |     |                |       | Post-ChR2 session |    |                |       |
|                  | Passes           |    | Duration (sec) |       | Passes          |     | Duration (sec) |       | Passes            |    | Duration (sec) |       |
|                  | SW               | NE | SW             | NE    | SW              | NE  | SW             | NE    | SW                | NE | SW             | NE    |
| Rat 1            | 46               | 34 | 140.7          | 105.2 | 27              | 49  | 175.4          | 119.5 | 29                | 13 | 88.0           | 181.2 |
| Rat 2            | 31               | 54 | 98.4           | 153.9 | 23              | 52  | 75.4           | 159.8 | 36                | 54 | 166.1          | 155.4 |
| Rat 3            | 26               | 46 | 84.7           | 102.2 | 21              | 41  | 84.3           | 160.6 | 31                | 54 | 107.8          | 167.1 |
| Rat 4            | 35               | 41 | 118.3          | 131.0 | 11              | 38  | 146.1          | 167.0 | 45                | 47 | 170.1          | 135.8 |
| Rat 5            | 33               | 48 | 100.3          | 130.7 | 15              | 38  | 101.6          | 128.4 | 47                | 44 | 113.6          | 96.0  |
| Rat 6            | 36               | 42 | 114.6          | 130.5 | 13              | 40  | 201.7          | 197.4 | 38                | 40 | 169.7          | 151.5 |

1242

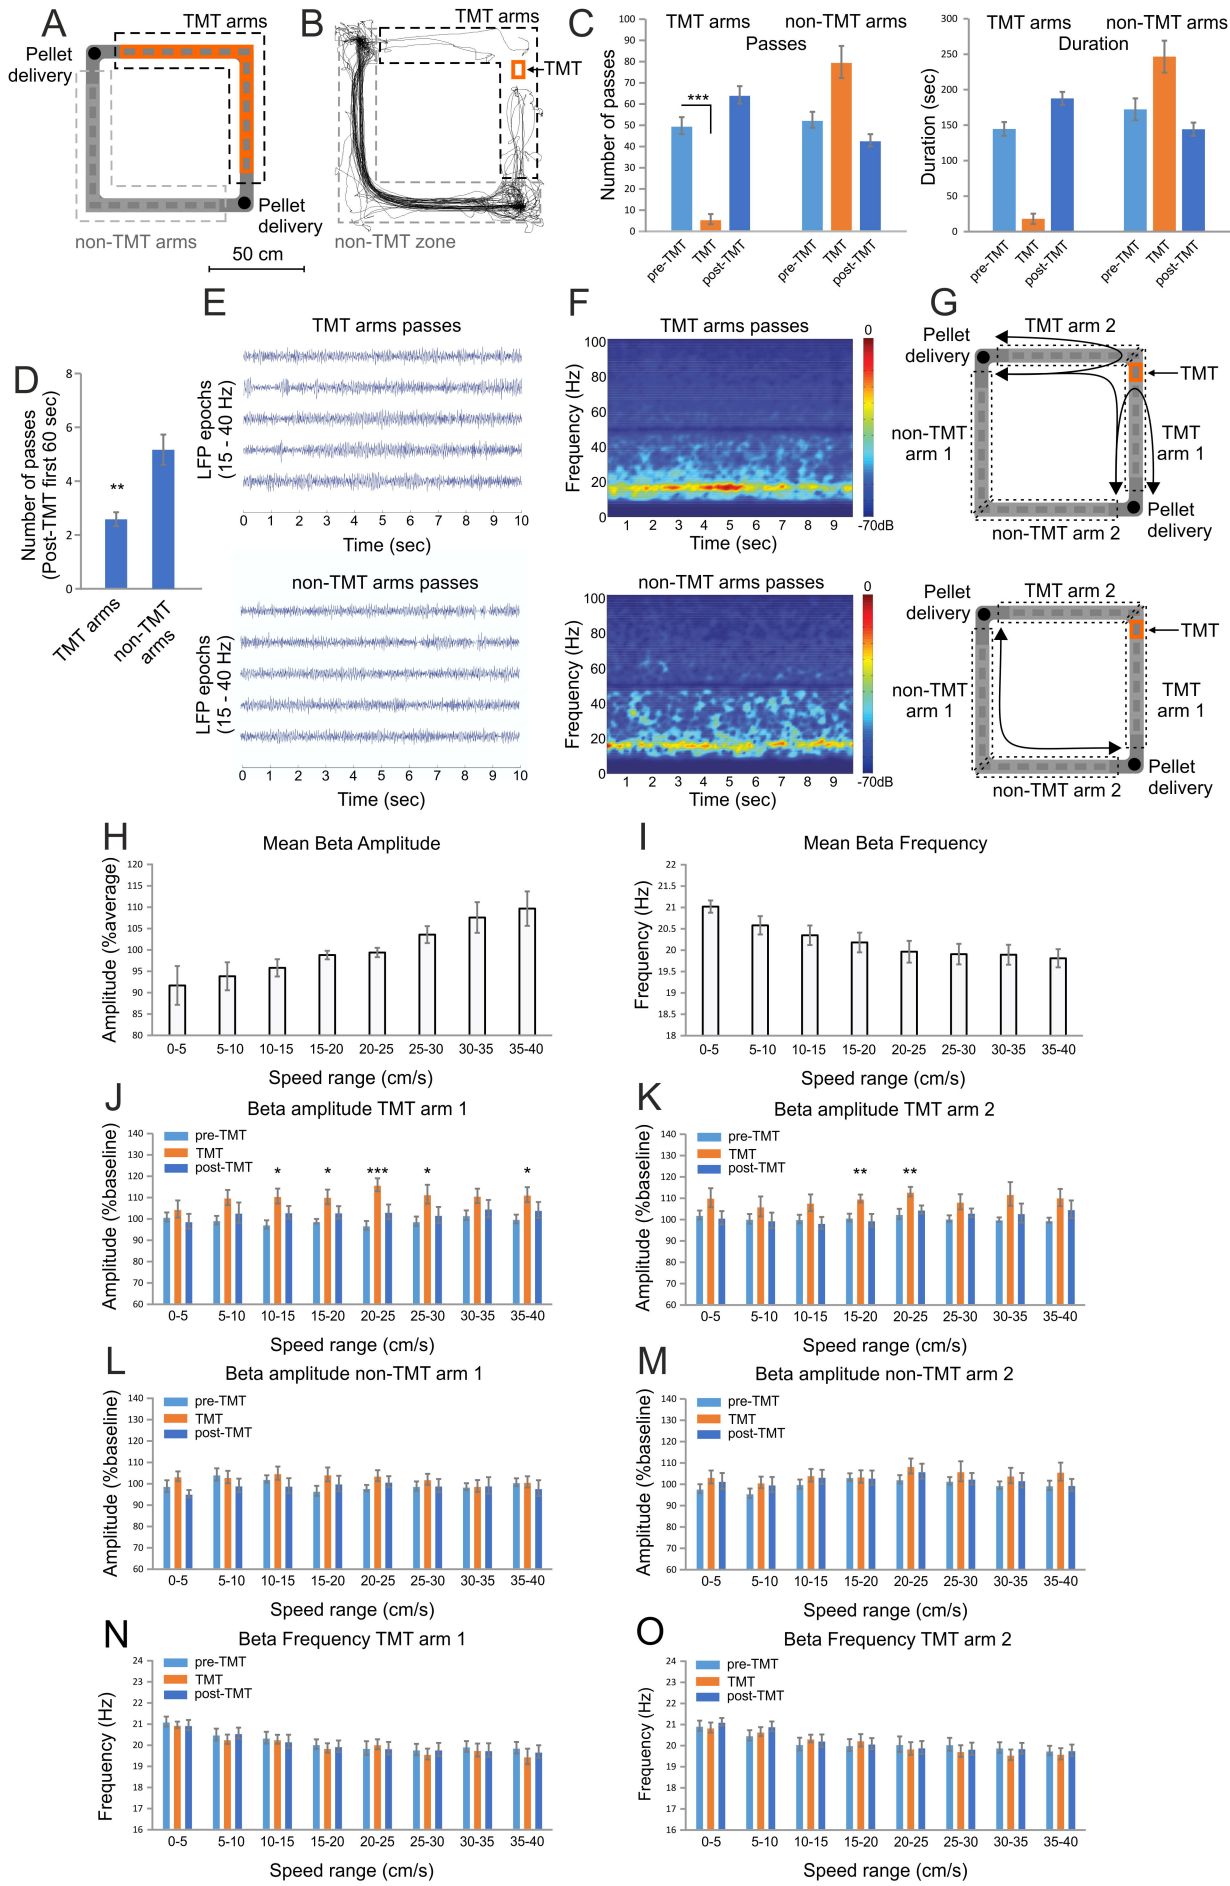

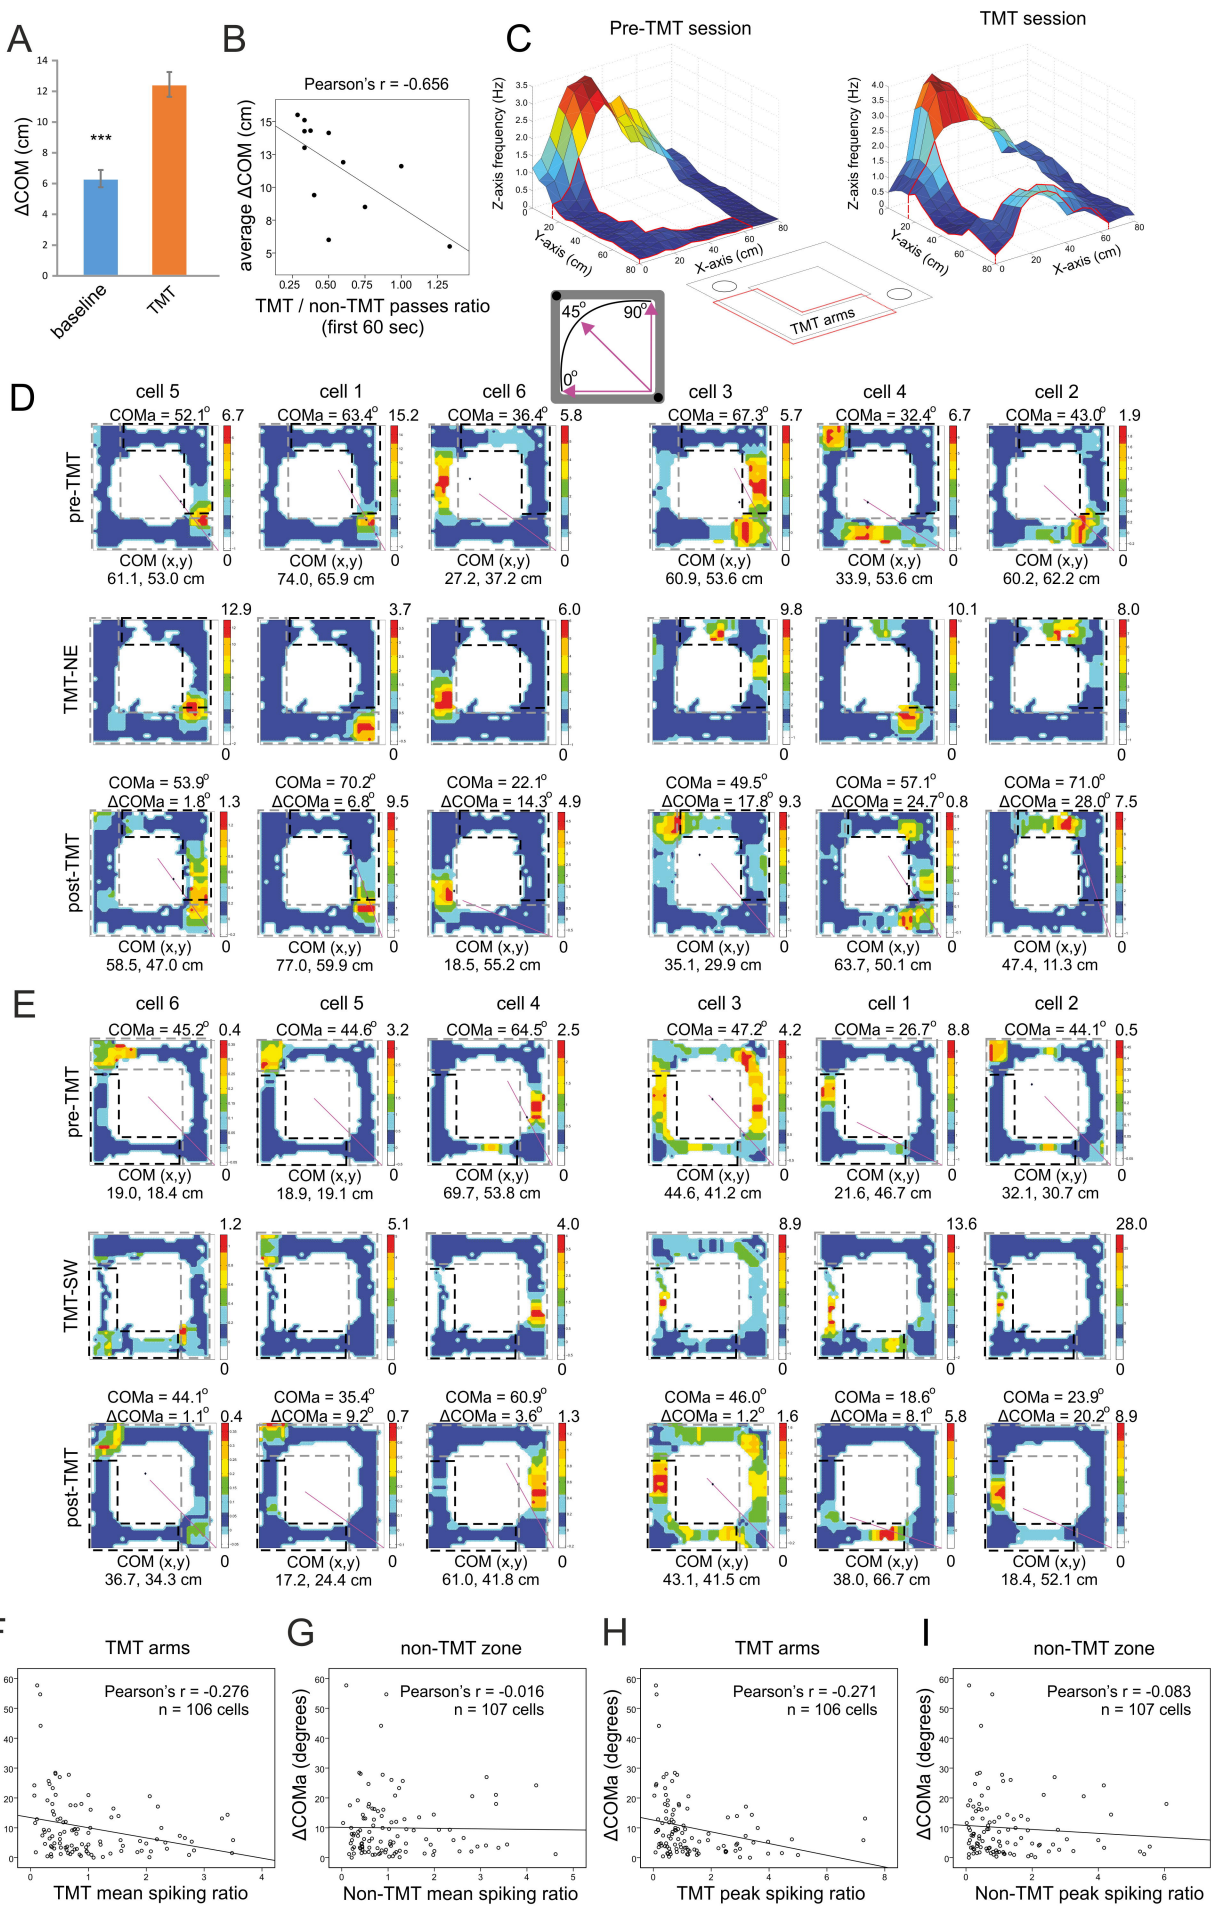



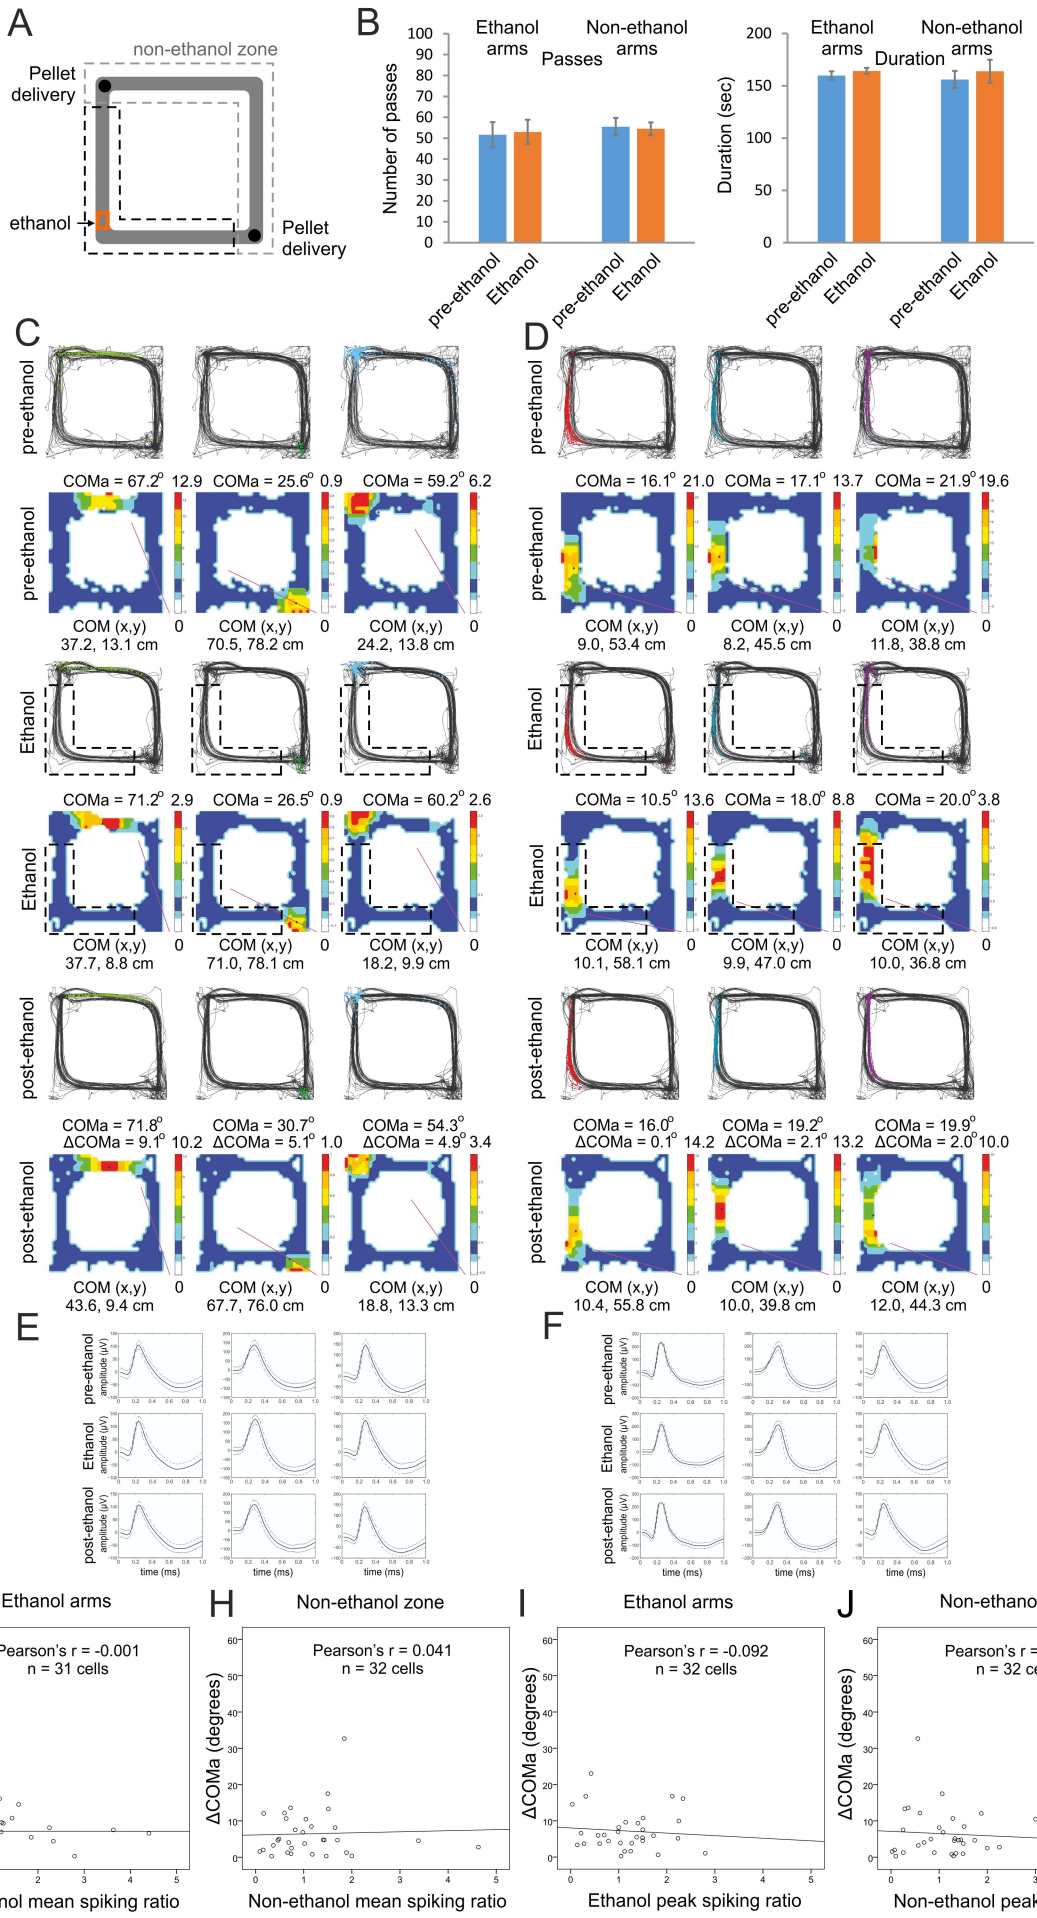

Place fields located in the TMT arms

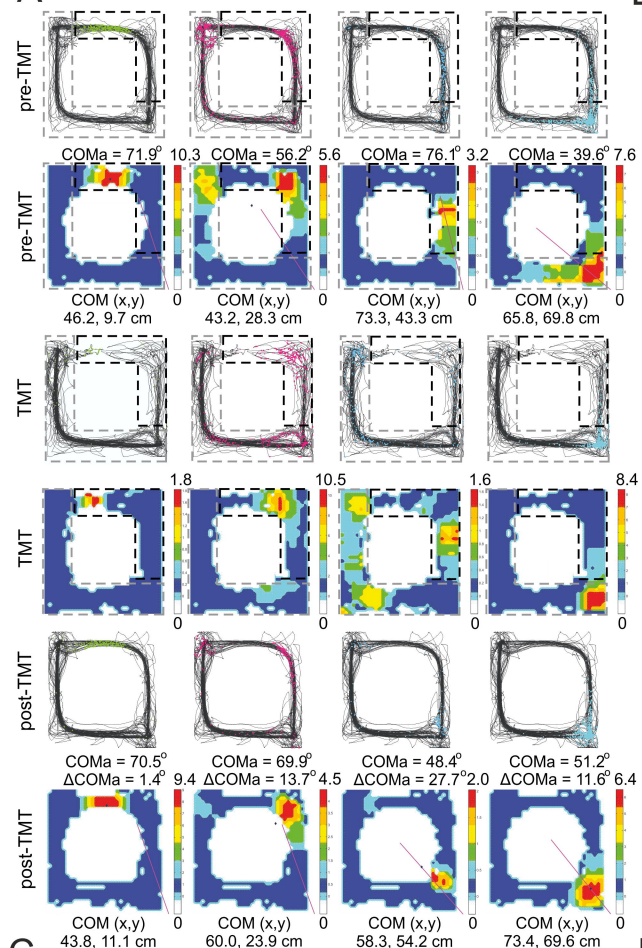

Place fields located in the non-TMT zone

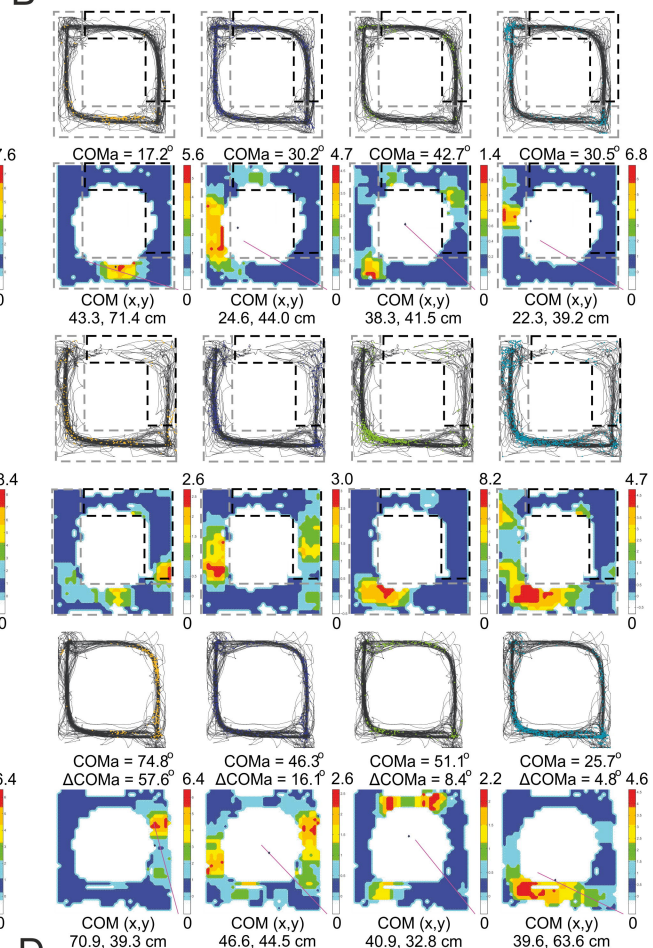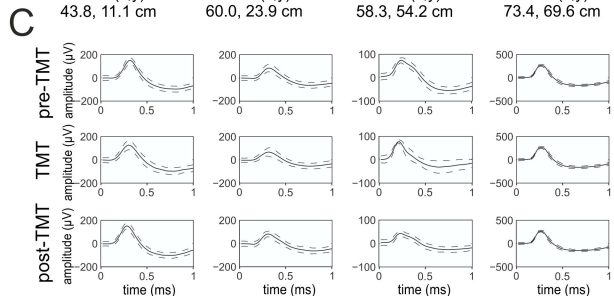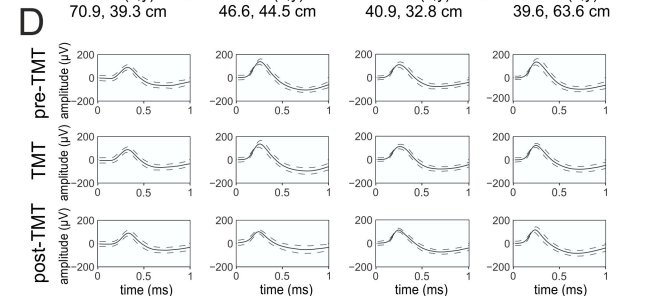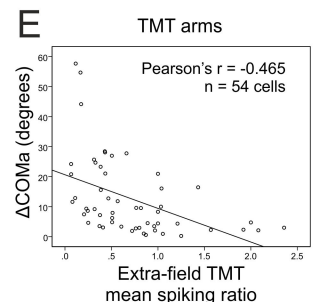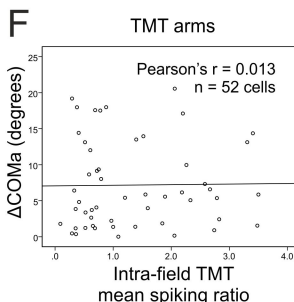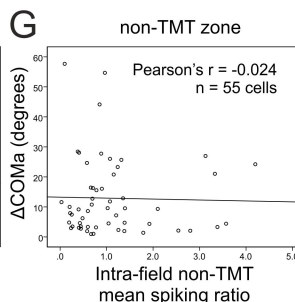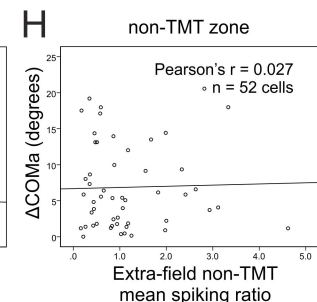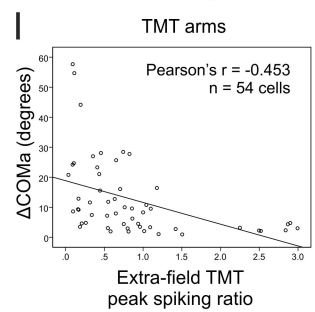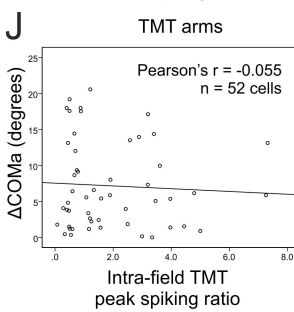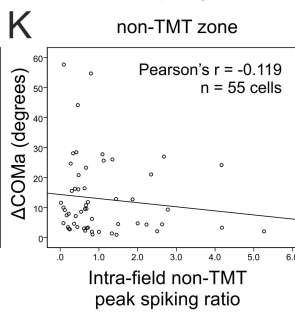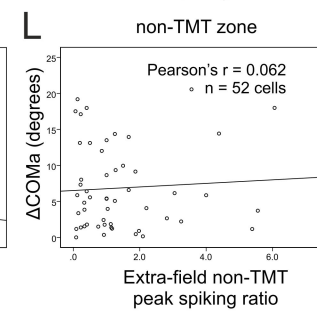



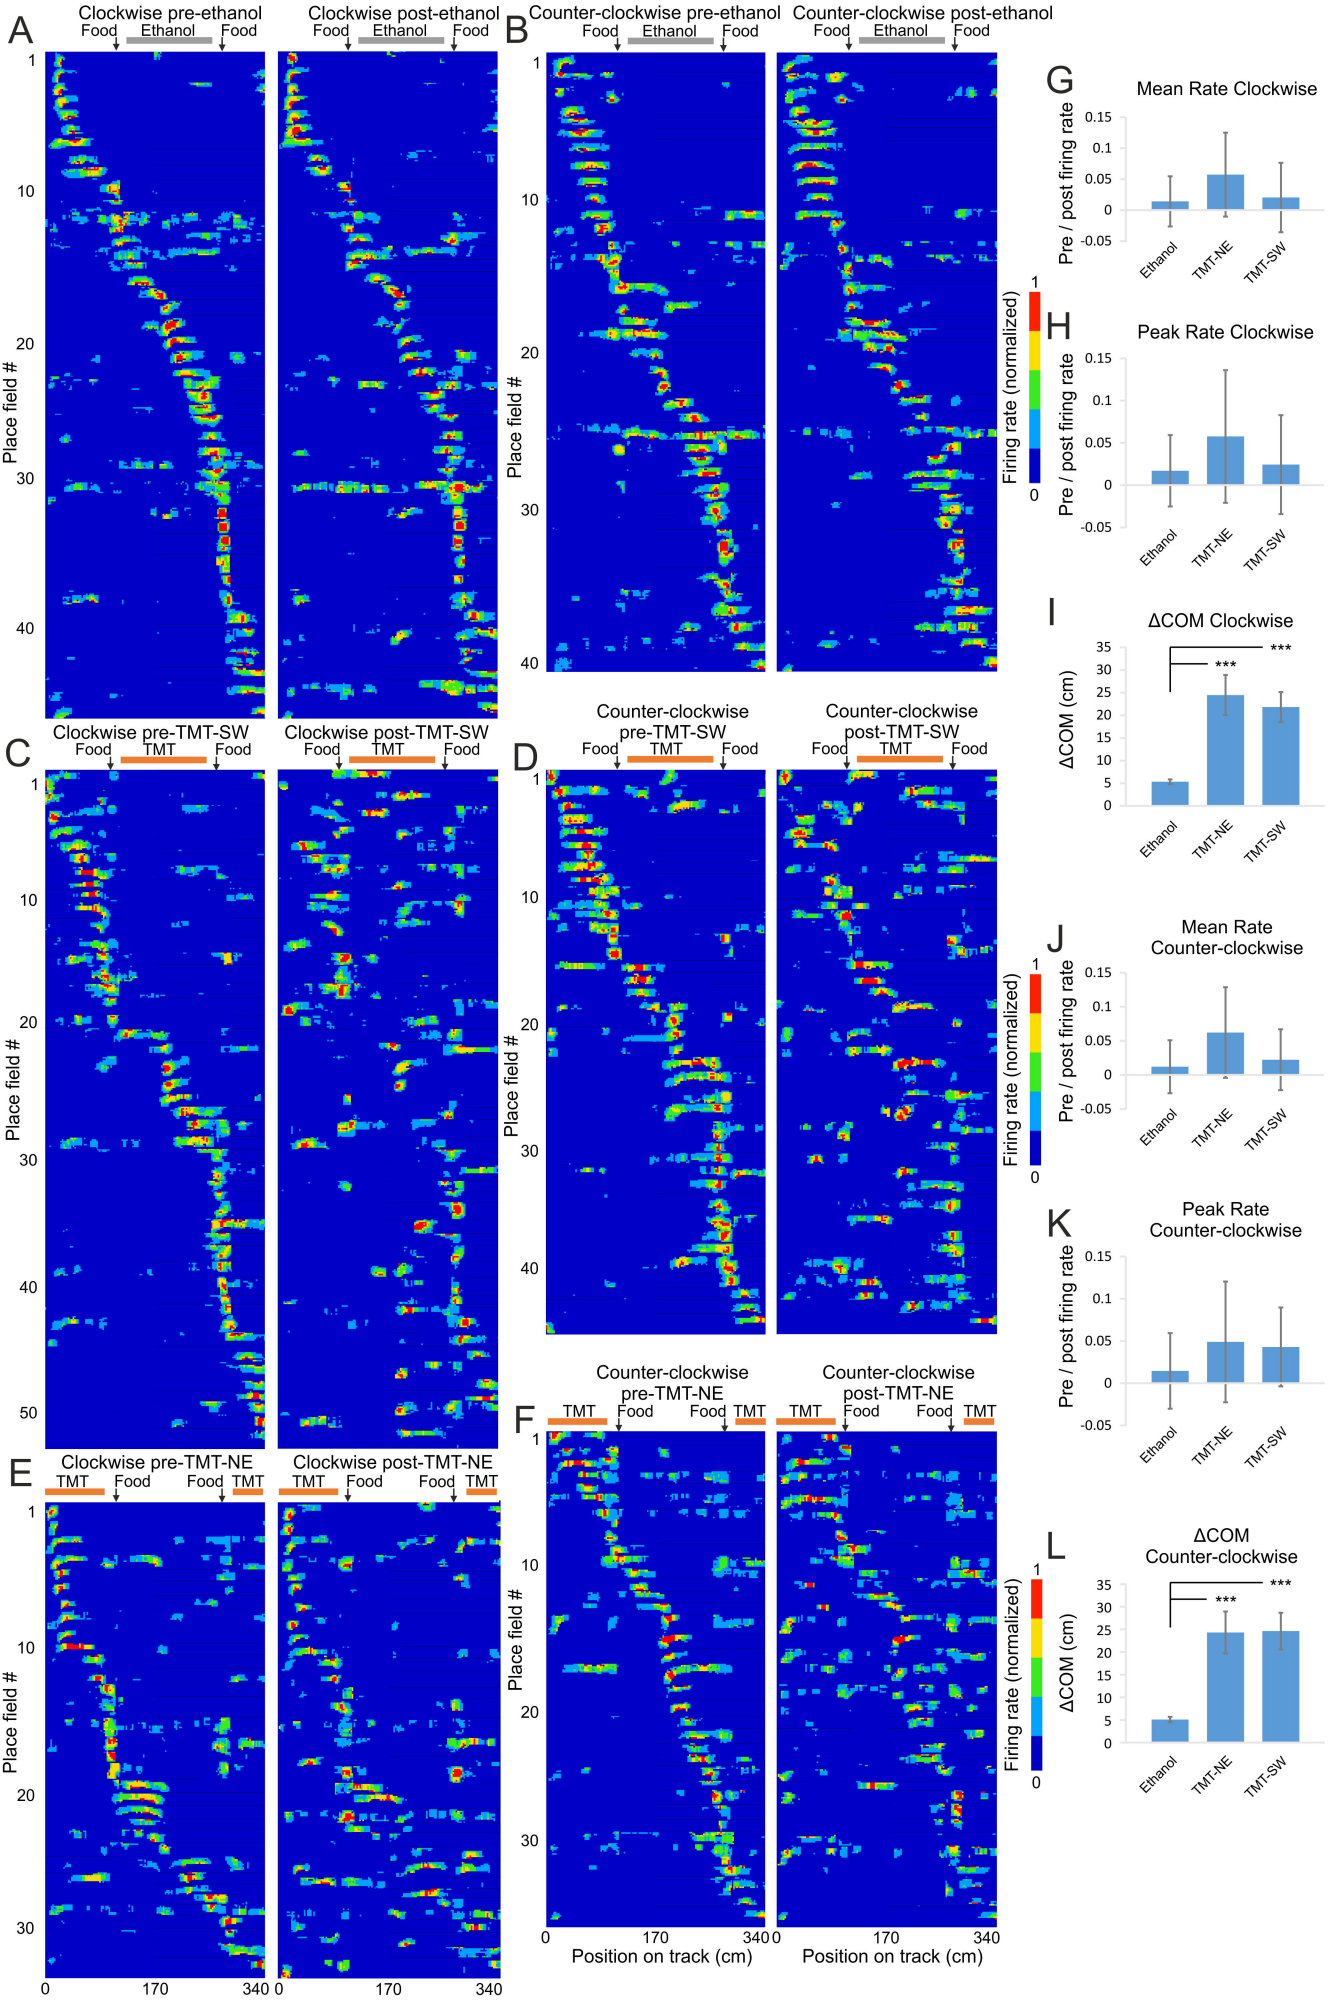

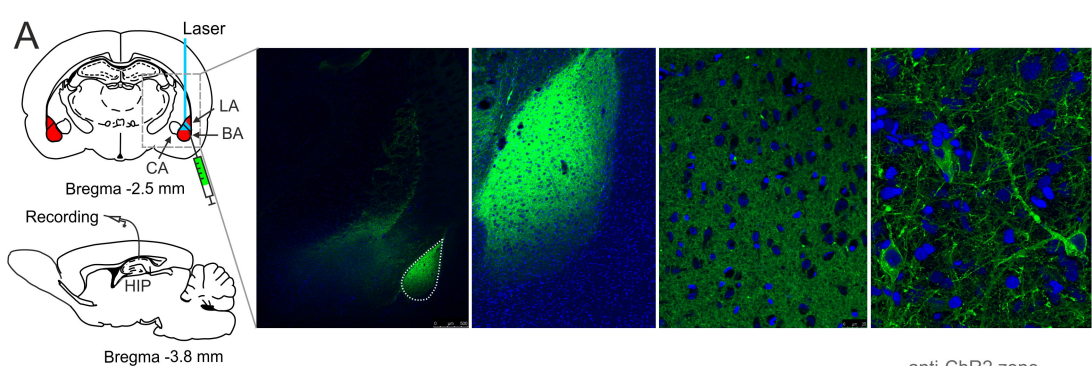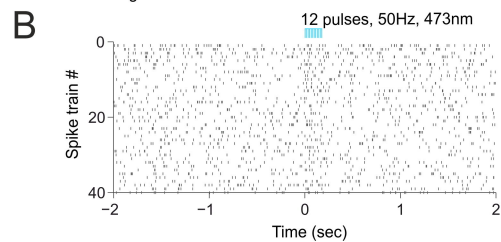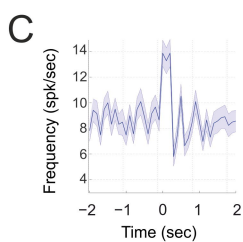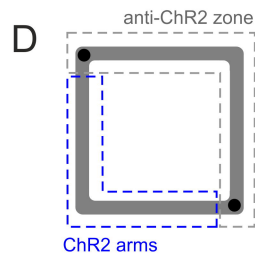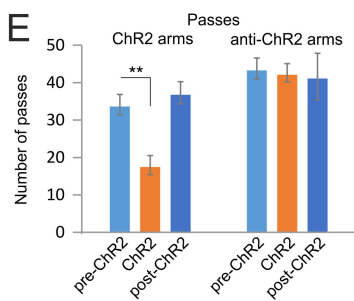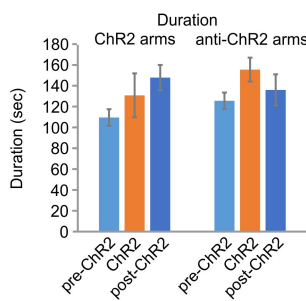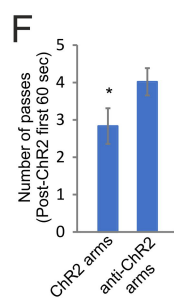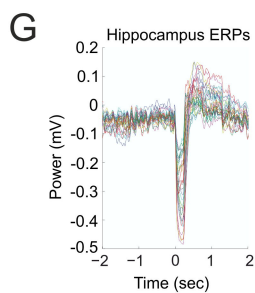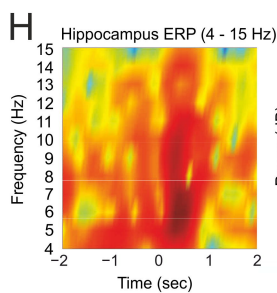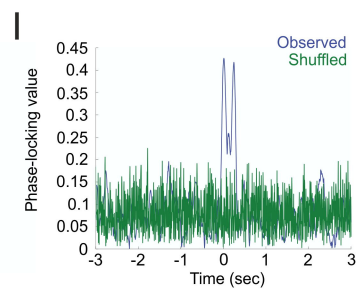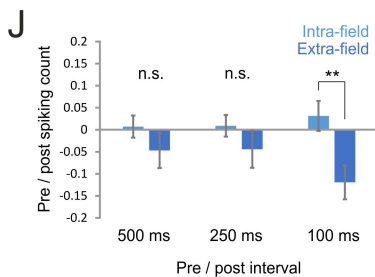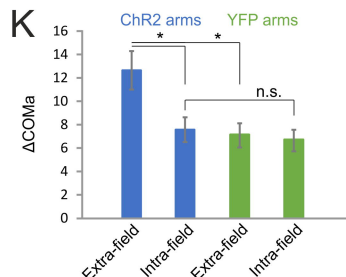

**A**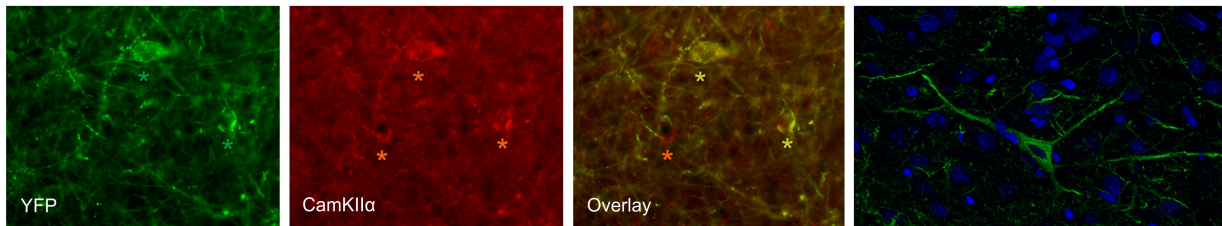**B**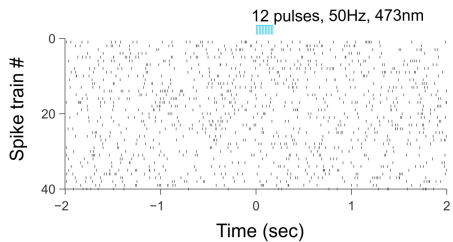**C**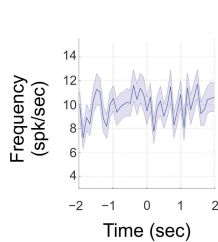**D**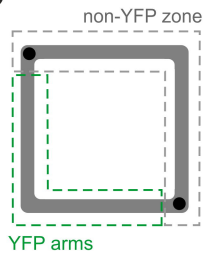**E**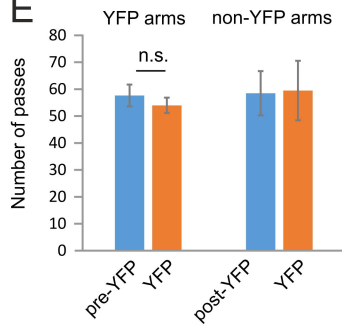**F**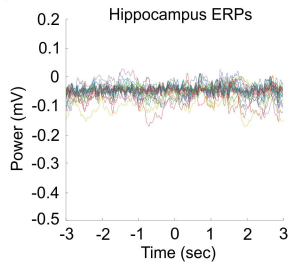**G**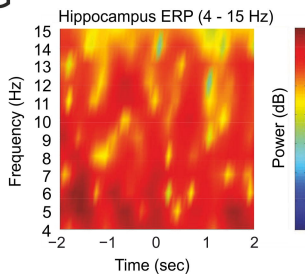**H**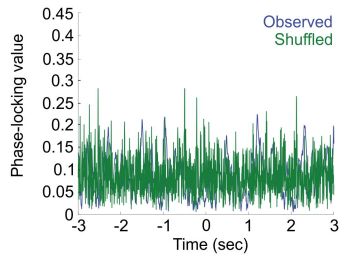

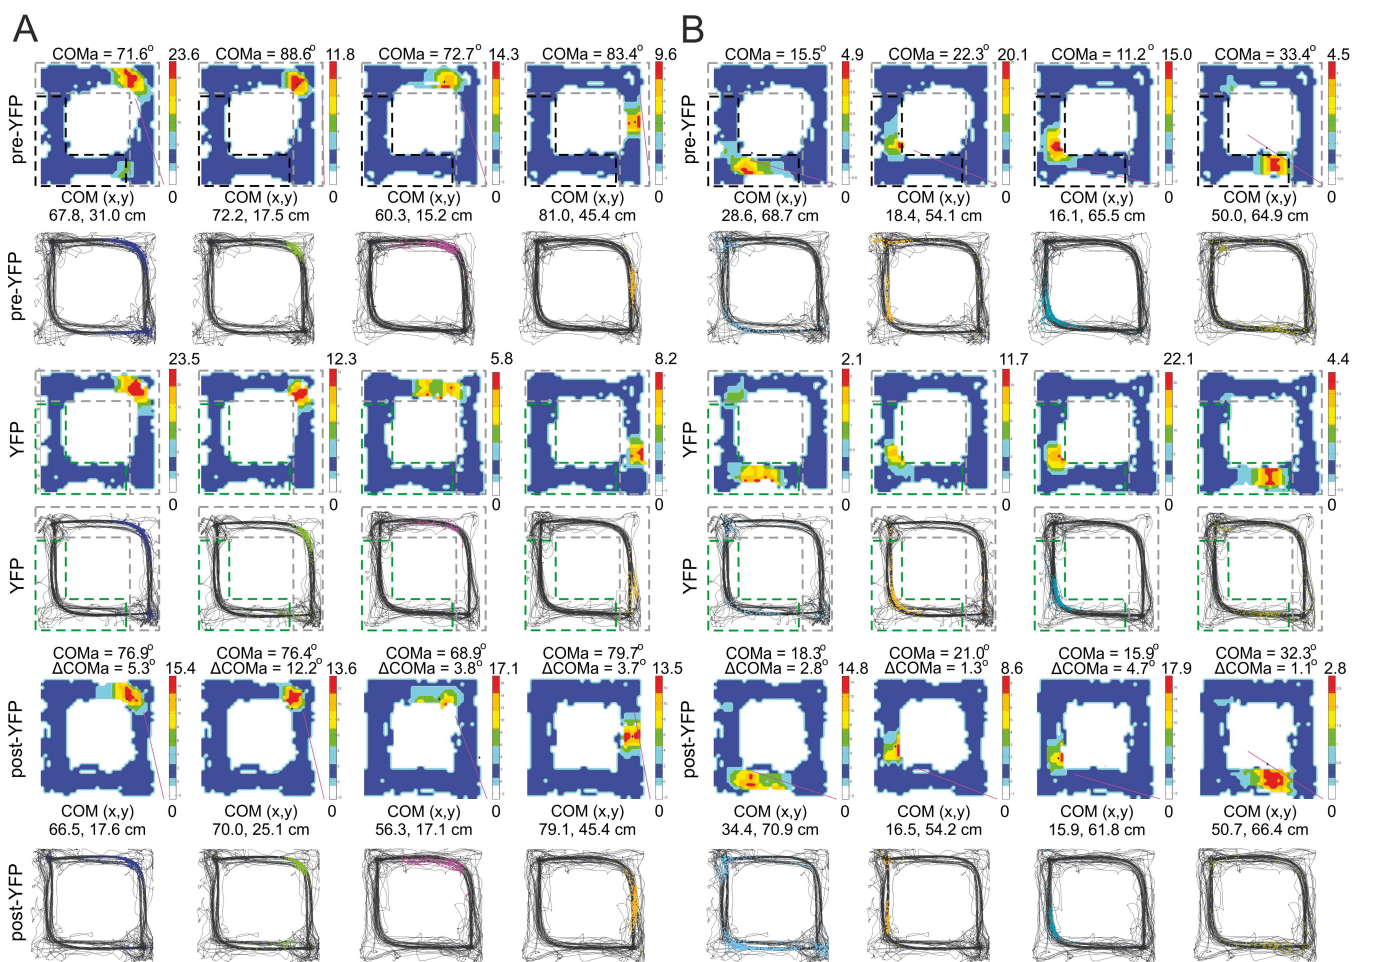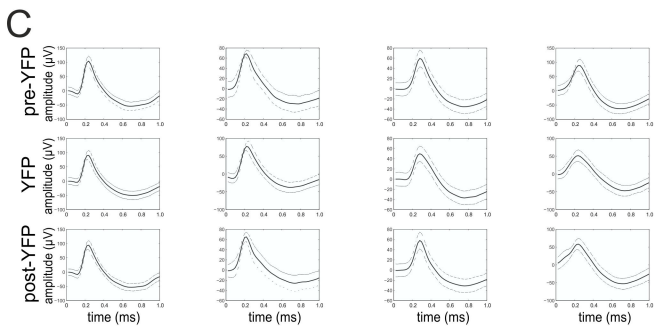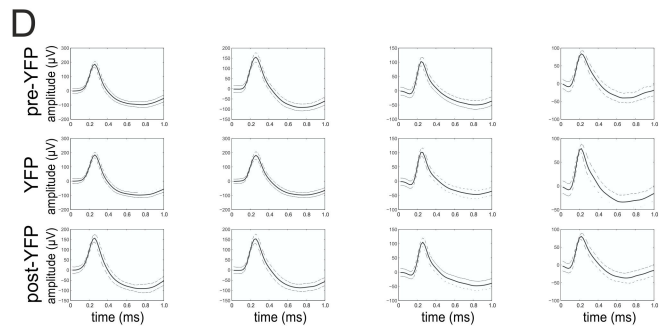



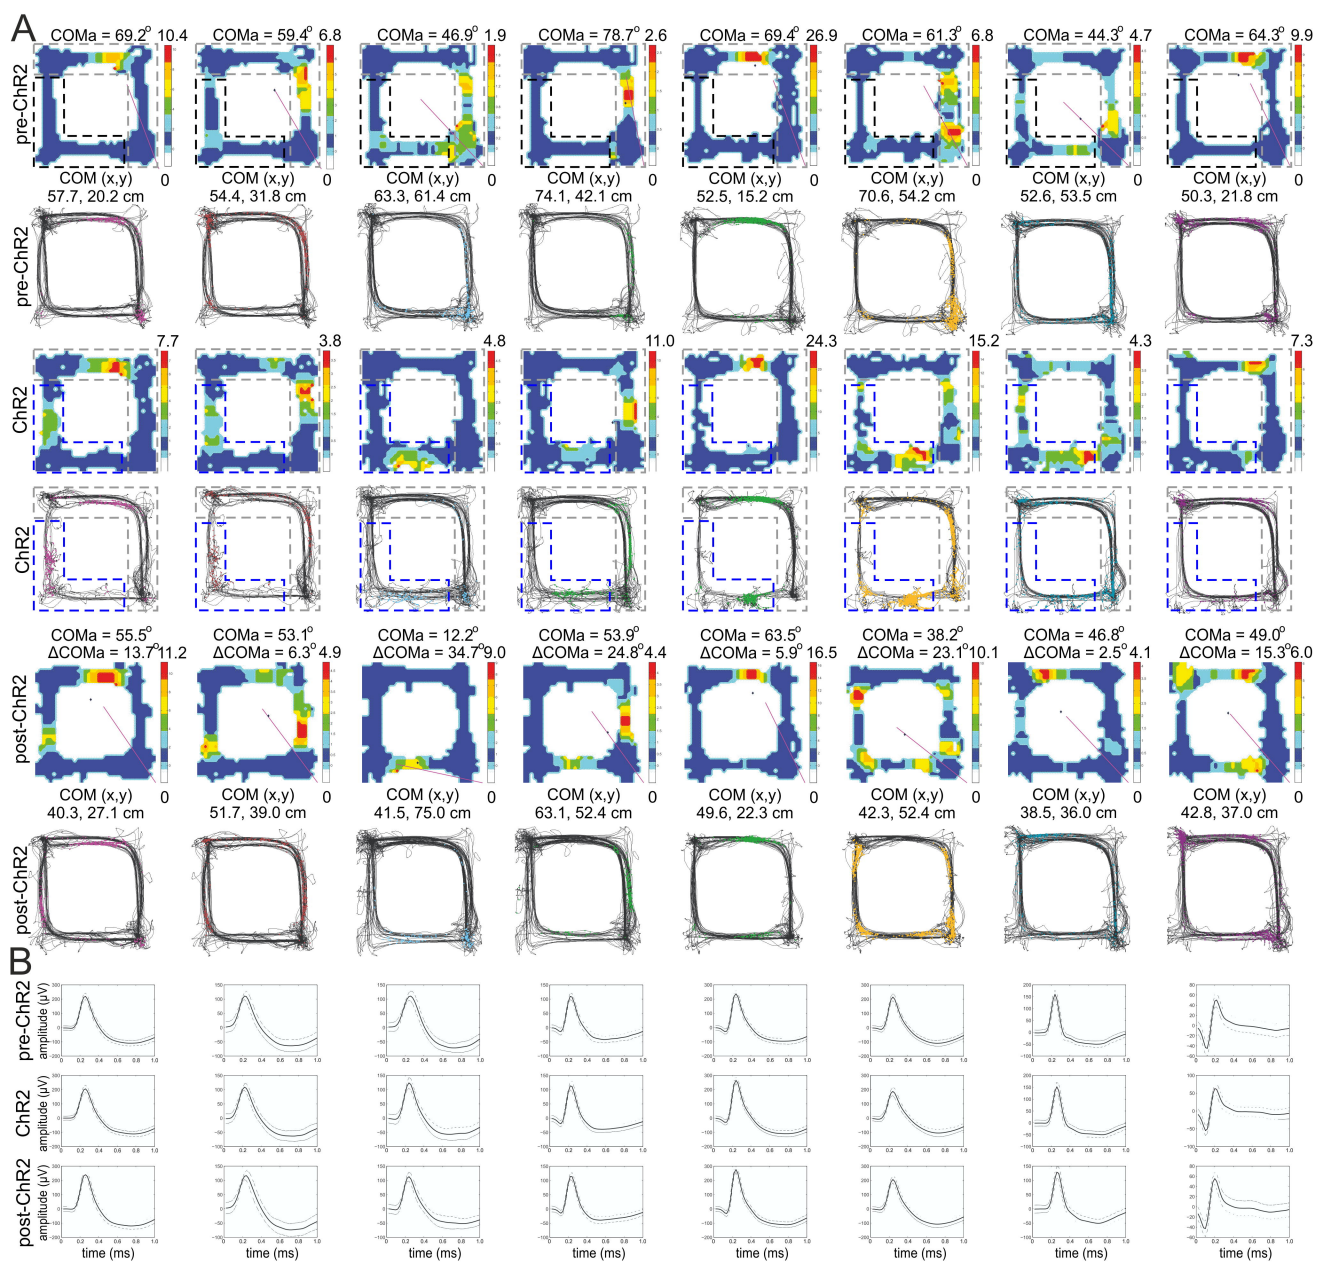

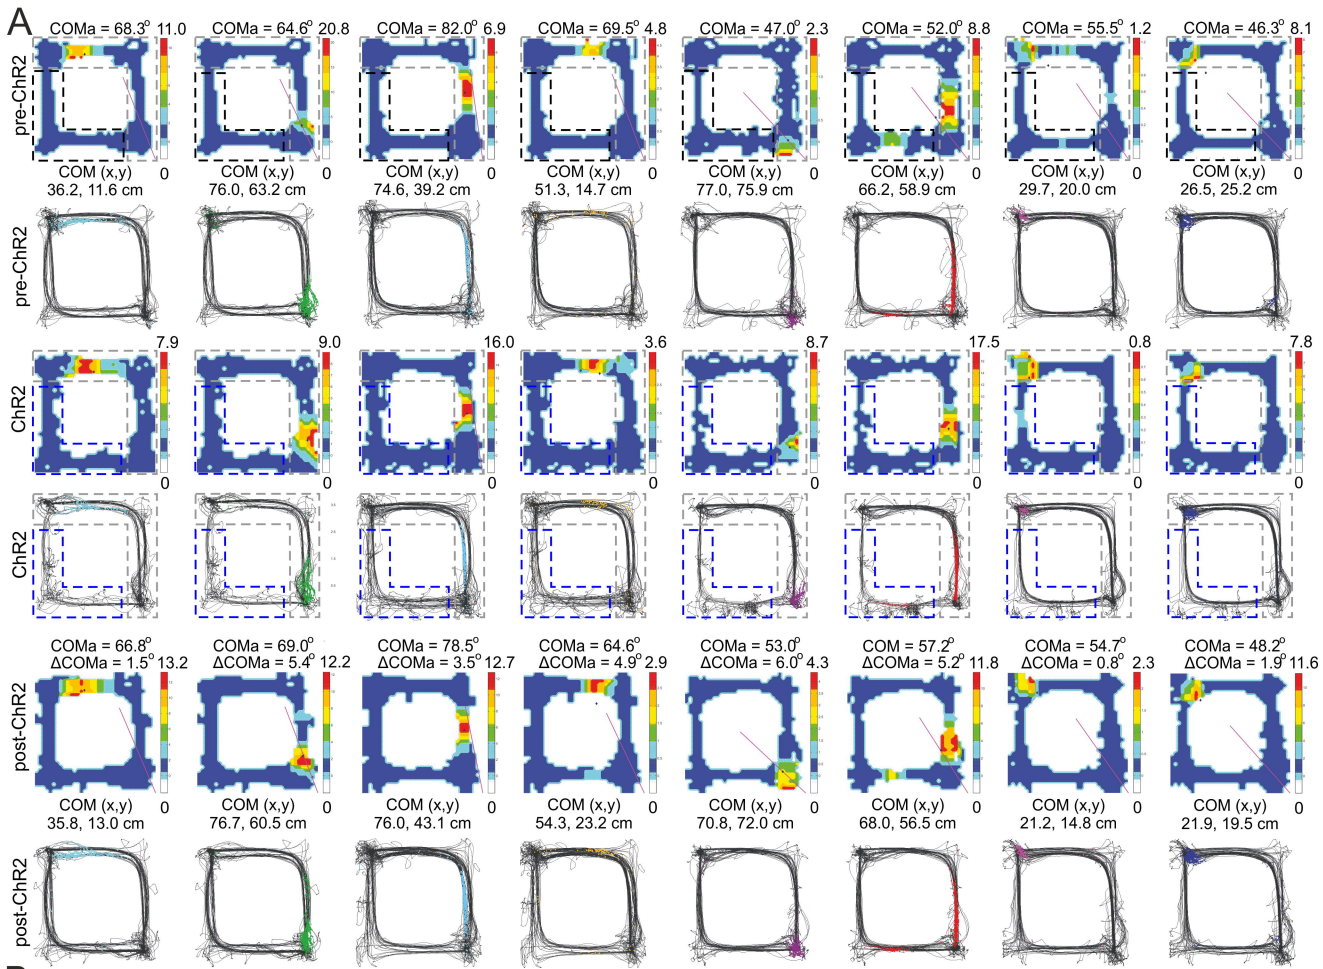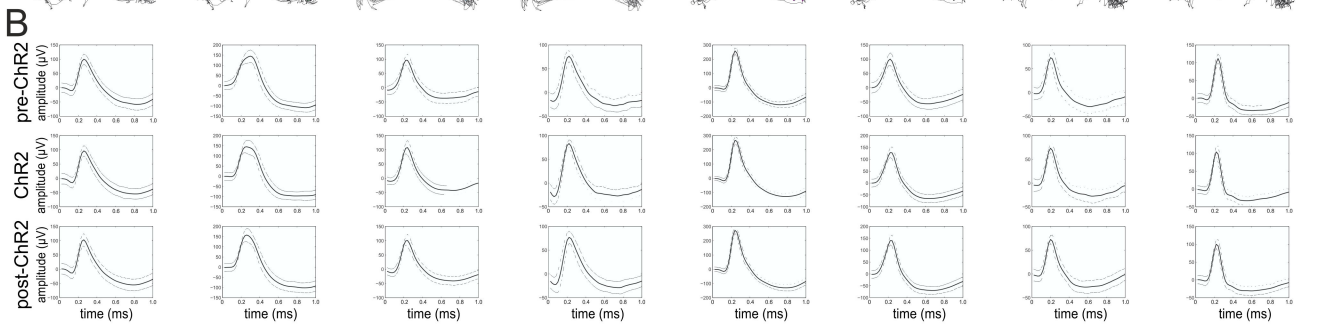

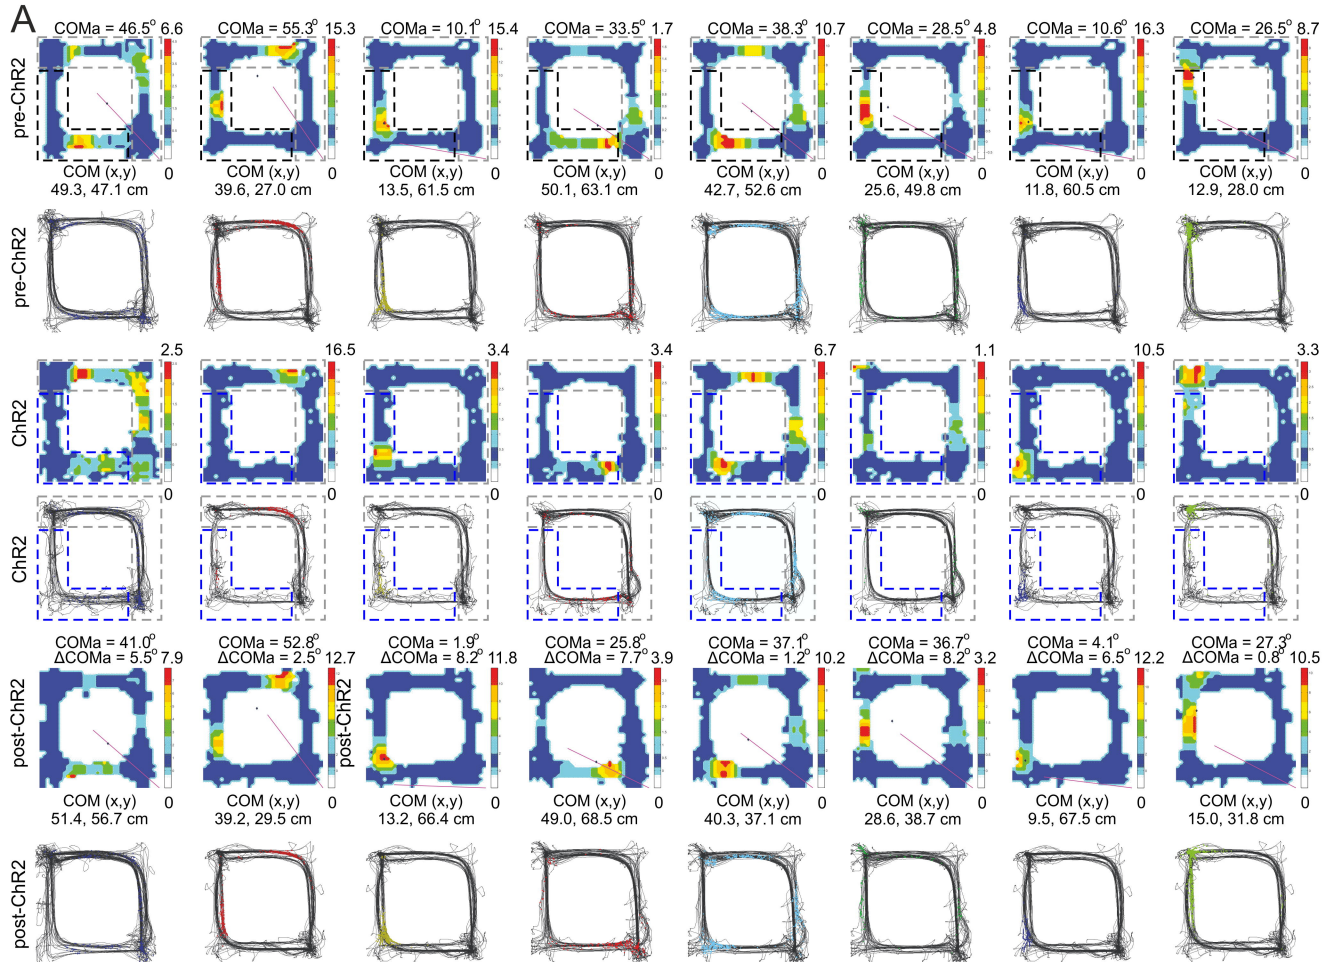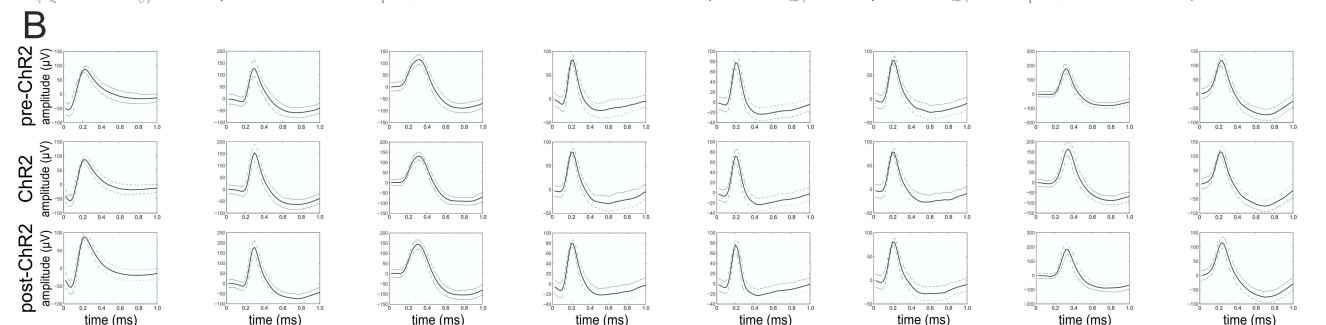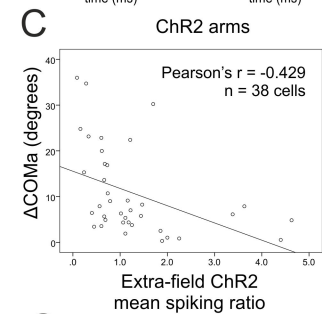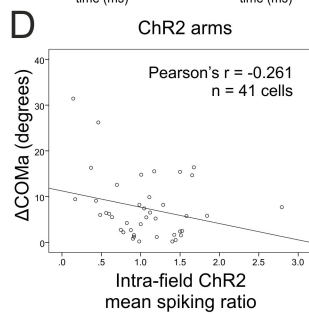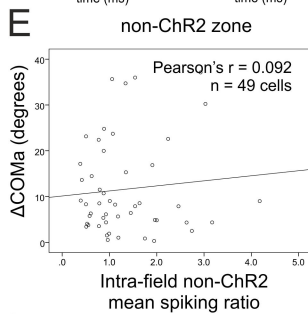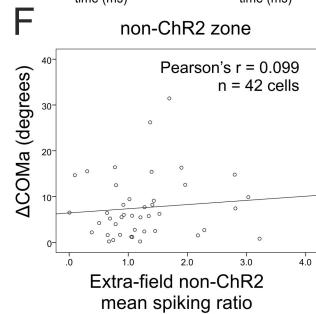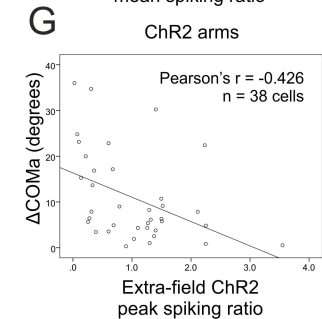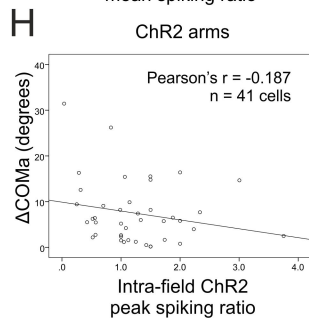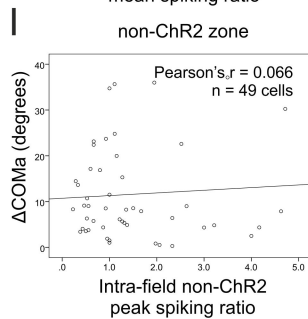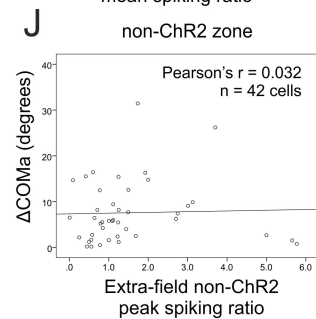



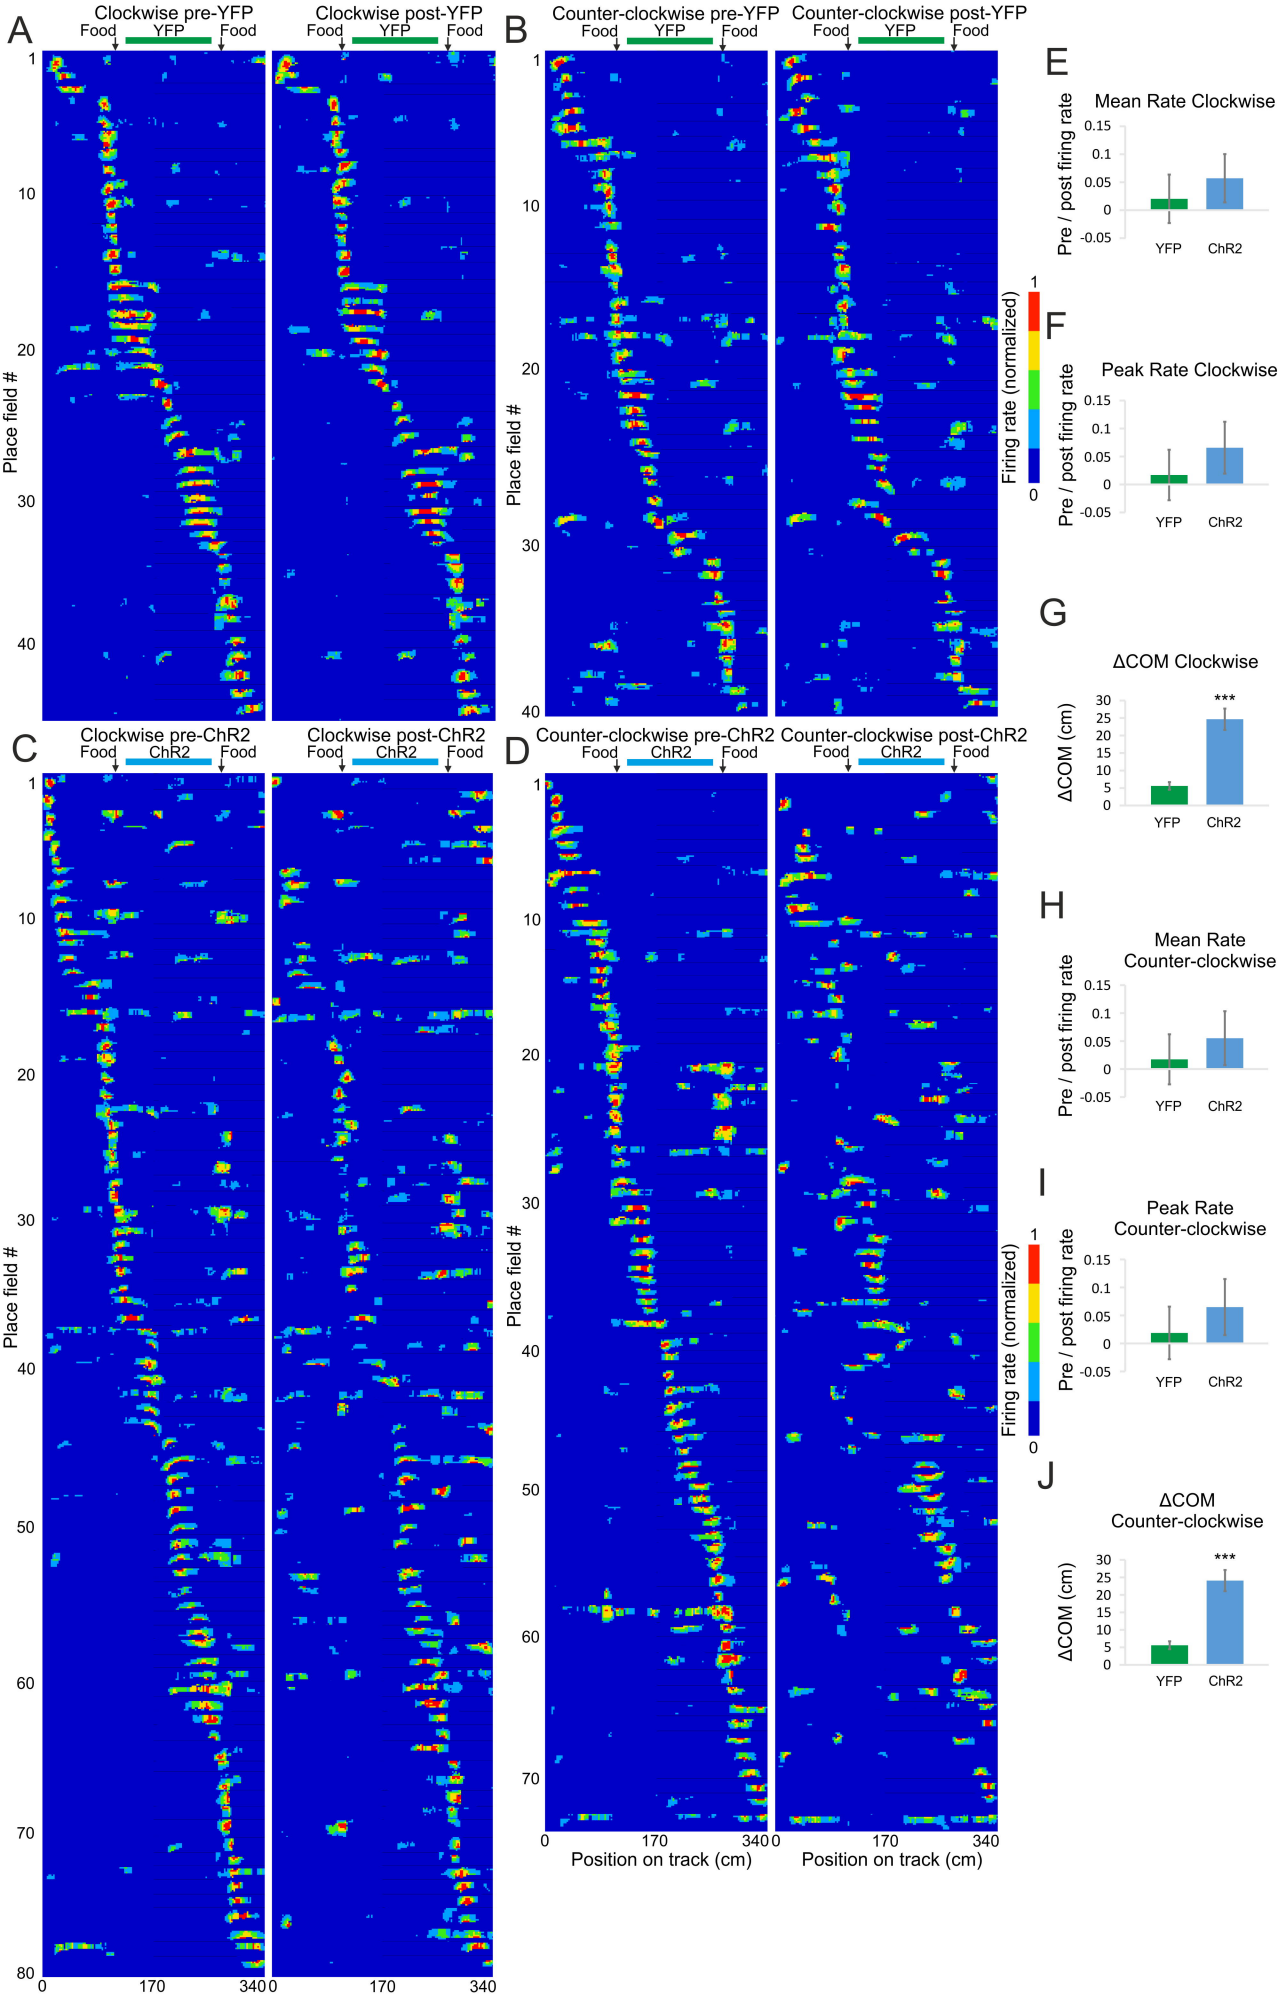

Source: https://www.biorxiv.org/content/10.1101/218180v2.full.pdf
